# Supplementary material for: Acute kidney injury in the UK: a replication cohort study of the variation across three regional populations
Source: PubMed Central journal article supplement (PMC6042563; doi:10.1136/bmjopen-2017-019435), 2018-06-30

Supplemental table 1 – AKI definition and phenotype criteria for this study

| <b>AKI Criteria</b>        | <b>AKI definition</b>                                                                                                                             |
|----------------------------|---------------------------------------------------------------------------------------------------------------------------------------------------|
| Criterion 1                | Serum creatinine $\geq 1.5$ times higher than the median of all creatinine values 8-90 days ago, or 91-365 days ago if no tests between 8-90 days |
| Criterion 2                | Serum creatinine $\geq 1.5$ times higher than the lowest creatinine within 7 days                                                                 |
| Criterion 3                | Serum creatinine $>26$ $\mu\text{mol/L}$ higher than the lowest creatinine within 48 hours                                                        |
| <b>AKI severity</b>        | <b>Staging definition (based on peak creatinine within 90 days of diagnosis)</b>                                                                  |
| Stage 1                    | Rise in creatinine of $>26$ $\mu\text{mol/L}$ ; or index/baseline ratio $\geq 1.5$ and $<2$                                                       |
| Stage 2                    | Index/baseline ratio $\geq 2$ and $<3$                                                                                                            |
| Stage 3                    | Index/baseline ratio $\geq 3$ ; or $\geq 1.5$ and index creatinine $>354$ $\mu\text{mol/L}$                                                       |
| <b>Prior AKI episodes</b>  | <b>Prior AKI definition</b>                                                                                                                       |
| No prior AKI               | AKI episode not preceded by any previous AKI episodes in the prior 3 years                                                                        |
| Prior AKI                  | AKI episode preceded by at least one previous AKI episode in the prior 3 years                                                                    |
| Recent prior AKI           | AKI episode preceded by at least one previous AKI episode in the prior 1 year                                                                     |
| <b>90 day AKI recovery</b> | <b>Recovery definition</b>                                                                                                                        |
| Recovery                   | Last creatinine within 90 days of AKI $<1.2$ times higher than the baseline creatinine at diagnosis                                               |
| Non-recovery               | Last creatinine within 90 days of AKI $\geq 1.2$ times higher than the baseline creatinine at diagnosis, or still receiving acute RRT             |
| “Untested”                 | No repeat blood tests taken within 90 days of AKI diagnosis                                                                                       |

Abbreviations: AKI, acute kidney injury; RRT, renal replacement therapy

Supplementary figure 1 – Map of the UK populations in this analysis

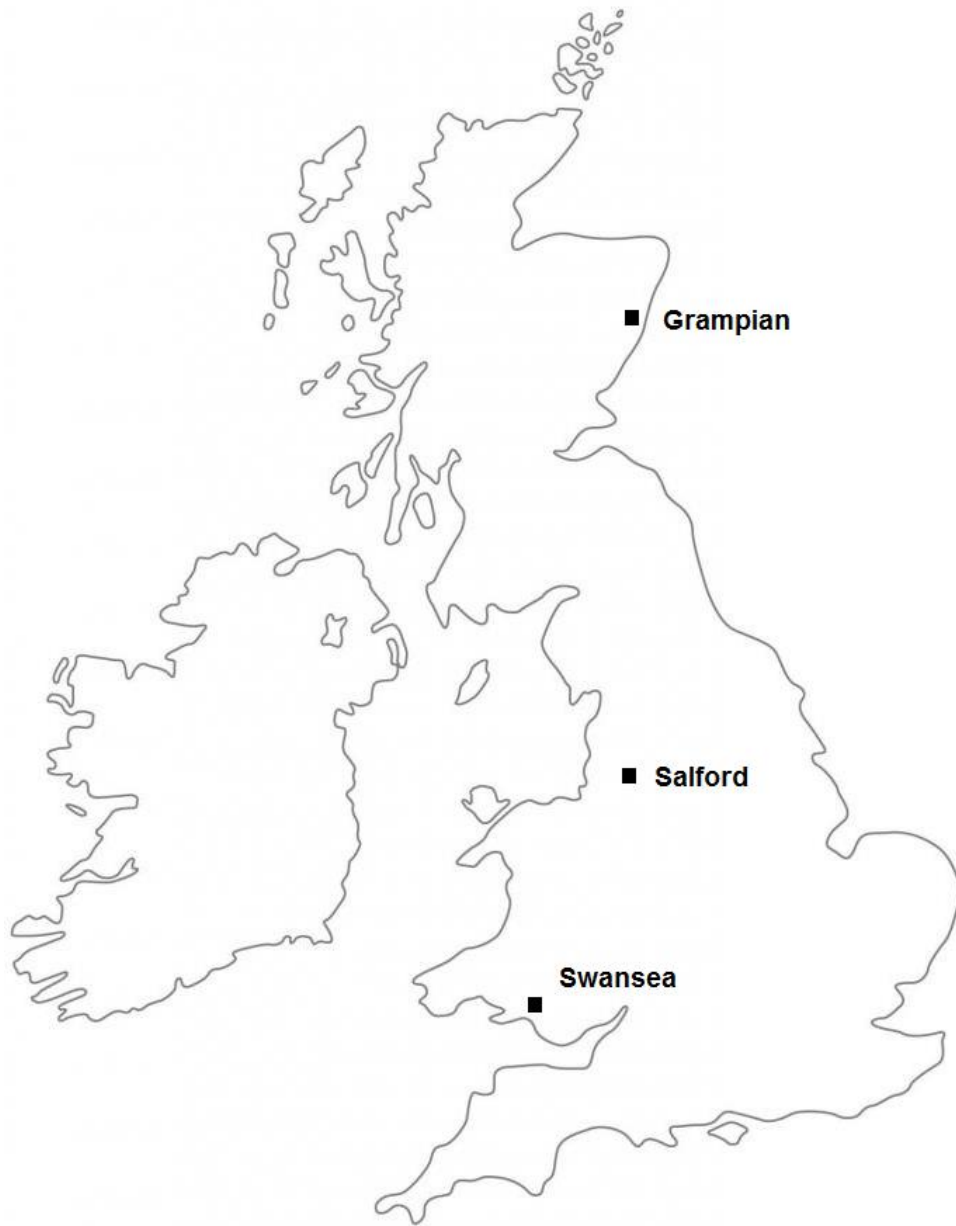

Supplemental figure 2 – Hypothetical patient illustrating look-back (for baseline) and look-forward (for AKI episode phenotyping) time periods from the start of an AKI episode

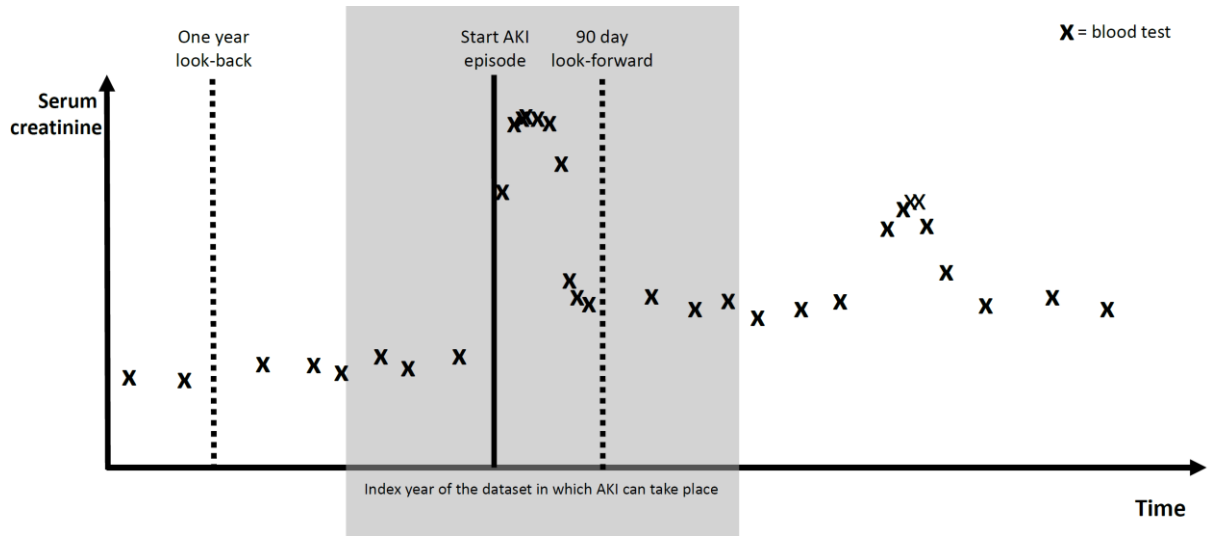

Supplement: bmjopen-2017-019435supp001.pdf [file bmjopen-2017-019435supp001.pdf]
