# Supplementary material for: Acute kidney injury in the UK: a replication cohort study of the variation across three regional populations
Source: PubMed Central journal article supplement (PMC6042563; doi:10.1136/bmjopen-2017-019435), 2018-06-30
Supplement: bmjopen-2017-019435.draft_revisions.pdf [file bmjopen-2017-019435.draft_revisions.pdf]

# BMJ Open

BMJ Open is committed to open peer review. As part of this commitment we make the peer review history of every article we publish publicly available.

When an article is published we post the peer reviewers' comments and the authors' responses online. We also post the versions of the paper that were used during peer review. These are the versions that the peer review comments apply to.

The versions of the paper that follow are the versions that were submitted during the peer review process. They are not the versions of record or the final published versions. They should not be cited or distributed as the published version of this manuscript.

BMJ Open is an open access journal and the full, final, typeset and author-corrected version of record of the manuscript is available on our site with no access controls, subscription charges or pay-per-view fees (<http://bmjopen.bmj.com>).

If you have any questions on BMJ Open's open peer review process please email [info.bmjopen@bmj.com](mailto:info.bmjopen@bmj.com)

# BMJ Open

## Acute kidney injury in the UK: temporal and geographical variation in three regions

|                               |                                                                                                                                                                                                                                                                                                                                                                                                                                                                                                                                                                                                                                                                                                                                                                                                                                                                                                                                                                                                                                                                                                                                                                                                                                                                                                                                                                                                                                                                                                                                                                                                                                                                                                                                                                                                                                                                                                                                                                                                                                                                                                                                                                                                                                                                     |
|-------------------------------|---------------------------------------------------------------------------------------------------------------------------------------------------------------------------------------------------------------------------------------------------------------------------------------------------------------------------------------------------------------------------------------------------------------------------------------------------------------------------------------------------------------------------------------------------------------------------------------------------------------------------------------------------------------------------------------------------------------------------------------------------------------------------------------------------------------------------------------------------------------------------------------------------------------------------------------------------------------------------------------------------------------------------------------------------------------------------------------------------------------------------------------------------------------------------------------------------------------------------------------------------------------------------------------------------------------------------------------------------------------------------------------------------------------------------------------------------------------------------------------------------------------------------------------------------------------------------------------------------------------------------------------------------------------------------------------------------------------------------------------------------------------------------------------------------------------------------------------------------------------------------------------------------------------------------------------------------------------------------------------------------------------------------------------------------------------------------------------------------------------------------------------------------------------------------------------------------------------------------------------------------------------------|
| Journal:                      | <i>BMJ Open</i>                                                                                                                                                                                                                                                                                                                                                                                                                                                                                                                                                                                                                                                                                                                                                                                                                                                                                                                                                                                                                                                                                                                                                                                                                                                                                                                                                                                                                                                                                                                                                                                                                                                                                                                                                                                                                                                                                                                                                                                                                                                                                                                                                                                                                                                     |
| Manuscript ID                 | bmjopen-2017-019435                                                                                                                                                                                                                                                                                                                                                                                                                                                                                                                                                                                                                                                                                                                                                                                                                                                                                                                                                                                                                                                                                                                                                                                                                                                                                                                                                                                                                                                                                                                                                                                                                                                                                                                                                                                                                                                                                                                                                                                                                                                                                                                                                                                                                                                 |
| Article Type:                 | Research                                                                                                                                                                                                                                                                                                                                                                                                                                                                                                                                                                                                                                                                                                                                                                                                                                                                                                                                                                                                                                                                                                                                                                                                                                                                                                                                                                                                                                                                                                                                                                                                                                                                                                                                                                                                                                                                                                                                                                                                                                                                                                                                                                                                                                                            |
| Date Submitted by the Author: | 01-Sep-2017                                                                                                                                                                                                                                                                                                                                                                                                                                                                                                                                                                                                                                                                                                                                                                                                                                                                                                                                                                                                                                                                                                                                                                                                                                                                                                                                                                                                                                                                                                                                                                                                                                                                                                                                                                                                                                                                                                                                                                                                                                                                                                                                                                                                                                                         |
| Complete List of Authors:     | <p>Sawhney, Simon; University of Aberdeen, Insitute of Applied Health Sciences</p> <p>Robinson, Heather; University of Manchester, Centre for Health Informatics, Division of Informatics, Imaging and Data Sciences, Faculty of Biology, Medicine and Health, Manchester Academic Health Science Centre</p> <p>van der Veer, Sabine N.; University of Manchester, Centre for Health Informatics, Division of Informatics, Imaging and Data Sciences, Faculty of Biology, Medicine and Health, Manchester Academic Health Science Centre</p> <p>Hounkpatin, Hilda; University of Southampton, Academic Unit of Primary Care and Population Sciences, Faculty of Medicine</p> <p>Scale, Timothy; Abertawe Bro Morgannwg University Health Board</p> <p>Chess, James; Abertawe Bro Morgannwg University Health Board</p> <p>Peek, N; University of Manchester, Centre for Health Informatics, Division of Informatics, Imaging and Data Sciences, Faculty of Biology, Medicine and Health, Manchester Academic Health Science Centre</p> <p>Marks, Angharad; University of Aberdeen, Insitute of Applied Health Sciences</p> <p>Davies, Gareth; Abertawe Bro Morgannwg University Health Board</p> <p>Fraccaro, Paolo; University of Manchester, Centre for Health Informatics, Division of Informatics, Imaging and Data Sciences, Faculty of Biology, Medicine and Health, Manchester Academic Health Science Centre</p> <p>Johnson, Matthew; University of Southampton, NIHR CLAHRC Wessex Data Science Hub, Faculty of Health Sciences</p> <p>Lyons, Ronan; Abertawe Bro Morgannwg University Health Board</p> <p>Nitsch, Dorothea; London School of Hygiene and Tropical Medicine</p> <p>Roderick, Paul; University of Southampton, Academic Unit of Primary Care and Population Sciences, Faculty of Medicine</p> <p>Halbesma, Nynke; University of Edinburgh, Usher Institute of Population Health Sciences and Informatics</p> <p>Miller-Hodges, Eve; University of Edinburgh, British Heart Foundation Centre for Cardiovascular Science</p> <p>Black, Corrinna; University of Aberdeen, Insitute of Applied Health Sciences</p> <p>Fraser, Simon; University of Southampton, Academic Unit of Primary Care and Population Sciences, Faculty of Medicine</p> |
| Keywords:                     | EPIDEMIOLGY, Nephrology < INTERNAL MEDICINE, Acute renal failure < NEPHROLOGY, PUBLIC HEALTH                                                                                                                                                                                                                                                                                                                                                                                                                                                                                                                                                                                                                                                                                                                                                                                                                                                                                                                                                                                                                                                                                                                                                                                                                                                                                                                                                                                                                                                                                                                                                                                                                                                                                                                                                                                                                                                                                                                                                                                                                                                                                                                                                                        |
|                               |                                                                                                                                                                                                                                                                                                                                                                                                                                                                                                                                                                                                                                                                                                                                                                                                                                                                                                                                                                                                                                                                                                                                                                                                                                                                                                                                                                                                                                                                                                                                                                                                                                                                                                                                                                                                                                                                                                                                                                                                                                                                                                                                                                                                                                                                     |

1  
2  
3  
4  
5  
6  
7  
8  
9  
10  
11  
12  
13  
14  
15  
16  
17  
18  
19  
20  
21  
22  
23  
24  
25  
26  
27  
28  
29  
30  
31  
32  
33  
34  
35  
36  
37  
38  
39  
40  
41  
42  
43  
44  
45  
46  
47  
48  
49  
50  
51  
52  
53  
54  
55  
56  
57  
58  
59  
60

SCHOLARONE™  
Manuscripts

For peer review only

## Acute kidney injury in the UK: temporal and geographical variation in three regions

### Short title:

### Variation in acute kidney injury in the UK

### Authors:

Dr Simon Sawhney MBChB<sup>1\*</sup>; Dr Heather A. Robinson PhD<sup>2\*</sup>; Dr Sabine N. van der Veer PhD<sup>2\*</sup>; Dr Hilda O. Hounkpatin PhD<sup>3\*</sup>; Dr Timothy M. Scale MBChB<sup>4\*</sup>; Dr James A. Chess MBChB<sup>4\*</sup>; Prof Niels Peek PhD<sup>2\*</sup>; Dr Angharad Marks MBChB<sup>1\*</sup>; Mr Gareth I. Davies MSc<sup>4\*</sup>; Dr Paolo Fraccaro PhD<sup>2\*</sup>; Mr Matthew J. Johnson BA<sup>3\*</sup>; Prof Ronan A. Lyons MD<sup>4\*</sup>; Prof Dorothea Nitsch MD<sup>5\*</sup>; Prof Paul J. Roderick MD<sup>6\*</sup>; Dr Nynke Halbesma PhD<sup>7\*</sup>; Dr Eve Miller-Hodges MBChB<sup>8\*</sup>; Prof Corri Black MBChB<sup>1\*</sup> and Dr Simon D.S. Fraser DM<sup>6\*</sup>

1. Institute of Applied Health Sciences, University of Aberdeen, Aberdeen, UK
  2. Centre for Health Informatics, Division of Informatics, Imaging and Data Sciences, Faculty of Biology, Medicine and Health, Manchester Academic Health Science Centre, The University of Manchester, Manchester, UK.
  3. NIHR CLAHRC Wessex Data Science Hub, Faculty of Health Sciences, University of Southampton, Southampton, UK
  4. Abertawe Bro Morgannwg University Health Board, Swansea, UK
  5. London School of Hygiene and Tropical Medicine, London, UK
  6. Academic Unit of Primary Care and Population Sciences, Faculty of Medicine, University of Southampton, Southampton, UK
  7. Usher Institute of Population Health Sciences and Informatics, University of Edinburgh, Edinburgh, UK
  8. British Heart Foundation Centre for Cardiovascular Science, University of Edinburgh, Edinburgh, UK
- \* The Farr Institute of Health Informatics Research

1  
2  
3  
4  
5  
6  
7  
8  
9  
10  
11  
12  
13  
14  
15  
16  
17  
18  
19  
20  
21  
22  
23  
24  
25  
26  
27  
28  
29  
30  
31  
32  
33  
34  
35  
36  
37  
38  
39  
40  
41  
42  
43  
44  
45  
46  
47  
48  
49  
50  
51  
52  
53  
54  
55  
56  
57  
58  
59  
60

**Correspondence to:**

Simon Sawhney; Institute of Applied Health Sciences; Room 1:040 Polwarth building; Foresterhill;

Aberdeen; AB25 2ZD; [simon.sawhney@abdn.ac.uk](mailto:simon.sawhney@abdn.ac.uk); +44 (0)1224 437130

For peer review only

**Abstract****Objectives**

A rapid growth in the reported rates of acute kidney injury (AKI) has led to calls for greater attention and resources for improving care. However, the reported incidence of acute kidney injury (AKI) also varies more than tenfold between previous studies. Some of this variation is likely to stem from methodological heterogeneity. This study explores the extent of cross-population variation in AKI incidence after minimising heterogeneity.

**Design**

Population-based cohort study analysing data from electronic health records from three regions in the UK through shared analysis code and harmonised methodology.

**Setting**

Three populations from Scotland, Wales and England covering three time periods: Grampian 2003, 2007, 2012; Swansea 2007; and Salford 2012.

**Participants**

All residents in each region, aged 15 years or older.

**Main outcome measures**

Population incidence of AKI, and AKI phenotype (severity, recovery, recurrence). Determined using shared biochemistry-based AKI episode code and standardised by age and sex.

**Results**

Respectively, crude AKI rates (per 10,000/year) were: 131, 138, 139, 151 and 124 (p value = 0.095); and after standardisation for age and sex: 147, 151, 146, 146 and 142 (p value = 0.257) for Grampian

1  
2  
3 2003, 2007, 2012; Swansea 2007; and Salford 2012. The pattern of variation in crude rates was  
4  
5 robust to any modifications of the AKI definition. Across all populations and time periods AKI rates  
6  
7 increased substantially with age from ~20 to ~550 per 10,000/year among those aged <40 and ≥70  
8  
9 years.

### 10 11 12 13 **Conclusion**

14  
15 When harmonised methods are used and age and sex differences are accounted for, a similar high  
16  
17 burden of AKI is consistently observed across different populations and time periods (~150 per  
18  
19 10,000/year). There are particularly high rates of AKI among older people. Policy-makers should be  
20  
21 careful not draw simplistic assumptions about variation in AKI rates based on comparisons that are  
22  
23 not rigorous in methodological terms.  
24  
25

### 26 27 28 29 **Strengths and limitations**

- 30  
31 - Previous studies have reported substantial variation in the incidence of AKI between regions  
32  
33 and over time, but have involved heterogeneous methods that limit comparability. To our  
34  
35 best knowledge, this is the first cross-population study of AKI incidence within one study,  
36  
37 with minimised methodological heterogeneity by sharing analysis code across regions.  
38  
39 - By using consistent methods, we provide new evidence that the rates of AKI in the UK are  
40  
41 similar across different regions and time periods: ~150 events per 10,000/year (1.5% of the  
42  
43 population).  
44  
45 - These findings may not be generalisable outside of the regions of the UK in the study.  
46  
47 However to enable researchers to replicate this work, we have made publically available our  
48  
49 analysis code for identifying and characterising AKI episodes.  
50  
51  
52  
53  
54  
55  
56  
57  
58  
59  
60

## Introduction

The reported outcomes following acute kidney injury (AKI) are consistently poor<sup>[1]</sup>. Reports of a growth in rates of AKI have led to calls for greater attention and resources for improving care<sup>[2]</sup>, but there is a more than tenfold variation between studies in the reported population incidence of AKI<sup>[3-7]</sup>. Population based estimates of AKI incidence range from 18 per 10,000/year<sup>[3]</sup> to 250 per 10,000/year<sup>[5]</sup> based on changes in serum creatinine over time, and from 3 to 40 per 10,000/year based on hospital episode codes for “non-dialysis requiring AKI”<sup>[8,9]</sup>. This wide variation is difficult to fully explain<sup>[10]</sup>, but is likely to be due in part to a changing clinical landscape with evolving international AKI criteria<sup>[11-14]</sup>, and different pragmatic interpretations of AKI criteria in research<sup>[5,15]</sup>. These reasons for variation are all potential sources of bias in clinical studies of AKI (figure 1). Without a clearer understanding of why populations differ, it is challenging (and potentially misleading) to interpret clinical research in context, to make comparisons across populations or over time, or to make informed public health recommendations.

Worldwide, health services are undertaking quality initiatives to increase clinical awareness and improve treatment of AKI<sup>[16-19]</sup> in order to achieve the International Society of Nephrology (ISN) target of eliminating avoidable deaths from AKI by 2025<sup>[20]</sup>. To evaluate the effectiveness of these initiatives, it is vital that there is a harmonisation of approaches to clinical research. This means minimising methodological heterogeneity so that the findings of future research are more comparable, and maximising transparency so that trends in disease incidence and outcomes can be understood. Methodological heterogeneity can arise when researchers extract data from different data infrastructures, make different assumptions, and adopt different criteria for identifying events. These steps are particularly important in AKI, because of the recognised challenges of AKI research: it occurs unpredictably, in different clinical locations<sup>[21]</sup>, may be transient<sup>[22]</sup>, and relies on trends rather than absolute values<sup>[12-14]</sup>. Small differences in how these challenges are handled can alter both the reported incidence and prognosis of AKI<sup>[5,15,21,23]</sup>. Despite its importance, this information is



1  
2  
3 often undocumented or described in insufficient detail for research to be reproduced<sup>[24]</sup>. We have  
4  
5 described these reasons for variation in AKI rates in a conceptual model (figure 1).  
6  
7

8  
9 Algorithms using blood test data from electronic health records (EHR), offer the potential of an  
10  
11 objective common language for observing common diseases in clinical practice, audit and  
12  
13 research<sup>[25]</sup>. In previous work, we developed an extended version of a widely used NHS algorithm for  
14  
15 detecting AKI in blood tests<sup>[26]</sup> which not only flags individual “AKI” blood tests, but also applies  
16  
17 phenotyping methods to combine AKI flagged blood tests into clinically meaningful AKI illness  
18  
19 episodes grouped by severity, duration, recovery and recurrence<sup>[27,28]</sup>. Sharing this algorithm  
20  
21 between researchers working with different populations provides an opportunity to develop a  
22  
23 harmonised approach to clinical research, robustly comparing the burden of AKI across different  
24  
25 populations and over time, even when patient-level data cannot be shared. We used this to study of  
26  
27 variation in the incidence of AKI across three populations from England, Scotland and Wales. The  
28  
29 analysis spans a decade of change in the clinical awareness of AKI<sup>[16]</sup>, change in international AKI  
30  
31 criteria<sup>[12-14]</sup> and change in the emphasis on community surveillance of people with chronic  
32  
33 diseases<sup>[29-31]</sup>. Our aim was to explore the extent of cross-population variation in AKI incidence while  
34  
35 minimising heterogeneity through harmonised methods.  
36  
37  
38  
39  
40

## 41 **Materials and Methods**

### 42 *Population profiles*

43  
44 This study compares datasets created using linked EHR data from primary and secondary care for  
45  
46 three UK regions with different “index” years from 2003-2014: Grampian 2003, 2007 and 2012;  
47  
48 Abertawe Bro Morgannwg University Health Board (ABMU, referred to in this article as Swansea)  
49  
50 2007; and Salford 2012 (supplemental figure 1). Each dataset involves health data from the UK NHS  
51  
52 and includes complete primary and secondary care biochemistry capture for the region. A fourth  
53  
54  
55  
56  
57  
58  
59  
60

1  
2  
3 region initially considered for this analysis (from South England) was excluded because initial  
4  
5 inspection of the data characteristics revealed that the population capture of the data source was  
6  
7 incomplete and might have led to bias in the estimation of AKI.  
8  
9

10  
11 NHS Grampian, a health authority in Scotland, is served primarily by one large tertiary hospital and  
12  
13 another district general hospital. All biochemistry for the dataset was extracted from a single  
14  
15 biochemistry department covering the entire regional population<sup>[5]</sup>. The Grampian dataset was  
16  
17 linked with the Scottish Renal Registry to exclude those already receiving chronic renal replacement  
18  
19 therapy (RRT), to avoid misclassification of RRT as AKI. Similarly, Salford (North England) represents  
20  
21 one borough of Greater Manchester, served by a single NHS hospital and biochemistry laboratory<sup>[32]</sup>.  
22  
23 Read codes (version 2) were used to extract biochemistry information and exclude records from  
24  
25 people receiving chronic RRT. In contrast, ABMU (Swansea, Wales) in 2007 covered a region served  
26  
27 by four district general hospitals and four laboratories using two information management  
28  
29 systems<sup>[33,34]</sup>. Those receiving chronic RRT could not be directly determined from a register but could  
30  
31 be excluded based on the hospital location marked on the blood tests.  
32  
33  
34  
35

36  
37 To provide further contextual description of these populations we collected information on  
38  
39 population mortality and relevant morbidities (renal and vascular) from the Office of National  
40  
41 Statistics, UK Renal Registry, and Quality Outcomes Framework (QOF) data entered by GP practices  
42  
43 (table 1). The QOF data represent incentivised recording by GPs of people with a given condition  
44  
45 (e.g. chronic kidney disease), rather than actual population prevalences.  
46  
47  
48

#### 49 *Conceptual framework*

50  
51 In figure 1, we provide a conceptual framework for understanding the sources of variation in AKI  
52  
53 revealed by our analysis. We sought to minimise “artefactual” methodological differences in AKI  
54  
55 episode rates by utilising only datasets where complete data capture (from both hospital and  
56  
57

1  
2  
3 community settings) was possible; by harmonising data preparation and cleaning; and by  
4  
5 standardising code sets for identifying AKI episodes. We also accounted for “real” potential sources  
6  
7 of variation in AKI rates by performing age and sex standardisation, stratification by baseline eGFR  
8  
9 for case-mix differences, and comparing the number of people with blood tests in rapid succession  
10  
11 as a surrogate for presence of an acute illness.  
12  
13  
14

### 15 *Data extraction and processing*

16  
17 This study used a distributed analysis approach to protect the confidentiality of patient-level data.  
18  
19 Data were analysed by on-site researchers working from the same code. Non-disclosive summary  
20  
21 statistics were aggregated into a single dataset, which was analysed centrally. This ensured that  
22  
23 patient-level data were never brought together in a single physical location. All serum creatinine  
24  
25 results for each individual were extracted. Creatinine values that were missing, were a non-value  
26  
27 (e.g. “sample inadequate”, “sample error”), or were lower than the limit for detection of the  
28  
29 analyser were excluded. The “Modification of Diet in Renal Disease” (MDRD) study estimated  
30  
31 glomerular filtration rate (eGFR) was calculated using the abbreviated 4 variable equation<sup>[35]</sup>. Finally,  
32  
33 to avoid a non-chronological evaluation of samples from different locations, where multiple samples  
34  
35 were available for the same individual on a given day, the sample with the highest creatinine value  
36  
37 was retained for analysis.  
38  
39  
40  
41  
42

### 43 *AKI identification and phenotyping*

44  
45 Kidney Disease Improving Global Outcomes (KDIGO)-based AKI detection and phenotyping algorithm  
46  
47 code was applied by separate analysts working locally on each dataset<sup>[14]</sup>. As summarised in  
48  
49 supplemental table 1, these criteria compare each blood test with previous “baseline” results within  
50  
51 the last 365 days (“the look-back period”) to determine if a recent change has occurred<sup>[27]</sup>. Where  
52  
53 AKI occurred, a “look-forward period” of 90 days was used to follow and phenotype the whole AKI  
54  
55 episode. In supplemental figure 2, these look-back and look-forward time periods are illustrated for  
56  
57  
58  
59  
60

1  
2  
3 a single hypothetical patient with respect to a moment of developing AKI within the index year. For  
4 those without AKI, the first eGFR of the index year was used as the baseline eGFR. For convenience  
5 we used a baseline eGFR  $<60$  ml/min/1.72m<sup>2</sup> as an indicator of chronic kidney disease. Shared Stata  
6 code provided the following outputs: number of blood tests consistent with AKI, number of AKI  
7 episodes, baseline eGFR, AKI episode severity stage, progression of AKI severity from a lower to  
8 higher stage, recovery to baseline within 90 days, and presence of prior AKI episodes in the past  
9 three years (i.e. making the episode a recurrent AKI episode).  
10  
11  
12  
13  
14  
15  
16  
17  
18

19 We also analysed data using more parsimonious versions of the KDIGO criteria: a “narrow  
20 interpretation” in which blood tests were only compared if they were no more than a week apart  
21 (i.e. restricted to criteria 2 and 3), and a “very narrow interpretation” comparing only tests no more  
22 than two days apart (i.e. restricted to criterion 3). If variation was due to a lack of robustness of AKI  
23 criteria in the face of estimating baseline from less recent data, these narrower interpretations  
24 would be expected to lead to less variation in AKI incidence.  
25  
26  
27  
28  
29  
30  
31  
32  
33

34 To ensure uniformity of the application and interpretation of AKI code, a mock dataset of 40  
35 hypothetical patients was developed. This mock dataset deliberately contained unformatted  
36 variables and a variety of creatinine trend patterns to represent a full range of data cleaning steps,  
37 AKI phenotypes, blood test intervals and interpretation issues. Each analyst used the same code on  
38 the test dataset and reproduced the same results before progressing to analysing regional data. We  
39 have made the algorithm code, mock dataset, and instructions for their optimal use in Stata freely  
40 available from <https://github.com/RenalHDRUK>.  
41  
42  
43  
44  
45  
46  
47  
48  
49  
50

### 51 *Statistical analysis*

52  
53 Analyses included the description of baseline characteristics, comparison of both crude and age-sex  
54 standardised rates of AKI, and phenotypes of AKI episodes. We also compared AKI rates in  
55  
56  
57

1  
2  
3 subgroups of baseline eGFR (as described above) and individual components of AKI criteria to  
4  
5 determine if variations in rate were robust to changes in the AKI definition (table 2). Finally, to  
6  
7 evaluate reasons for residual variation, we described the patterns of blood testing in each region,  
8  
9 including the frequency of blood tests, the regularity (e.g. blood tests no more than 2 and 7 days  
10  
11 apart) and blood test location (hospital and outpatient/community).

12  
13  
14  
15 Baseline characteristics included age, sex, the number of people with evidence of renal impairment  
16  
17 (eGFR < 60 ml/min/1.73m<sup>2</sup>) on their first test in the index year, the number of people with blood  
18  
19 tests sufficiently close together for it to be possible to detect an “AKI” result if present (two tests no  
20  
21 more than 365 days apart).

22  
23  
24  
25  
26 We compared population rates of AKI episodes across each region and index year. We compared AKI  
27  
28 episode rates using national statistics mid-year population estimates for each region, and then  
29  
30 standardised to the England population for 2012<sup>[36]</sup>, a reference population selected as two of the  
31  
32 three regions provided 2012 data. All AKI episodes in the index year counted towards the overall AKI  
33  
34 episode rate. One way ANOVA followed by Tukey’s post-hoc test (in the event of significant  
35  
36 differences) was used to identify pairwise significant differences in population level AKI episode  
37  
38 rates.

39  
40  
41  
42  
43 For people with sufficient blood tests to potentially detect an episode of AKI (at least two tests no  
44  
45 more than 365 days apart), we compared rates within eGFR strata (<30, 30-44, 45-59 and ≥60  
46  
47 ml/min/1.73m<sup>2</sup>). The proportion of the population with at least one AKI result based on AKI criteria  
48  
49 1, 2, or 3 (table 2), and the proportion of the population with at least one AKI result based on  
50  
51 narrower interpretations of KDIGO criteria (restricting to criteria 2 & 3, or criterion 3 alone) were  
52  
53 also recorded. To evaluate the impact of incomplete biochemistry capture, we also recalculated AKI  
54  
55  
56  
57  
58  
59  
60

1  
2  
3 rates using only tests taken from people in hospital. Of note a distinction between hospital inpatient  
4  
5 and outpatient results was not possible in Salford  
6  
7

8  
9 To evaluate potential sources of residual variation in AKI rates after harmonised analysis we  
10  
11 compared patterns of blood testing (number, frequency and location).  
12  
13

#### 14 15 *Patient involvement*

16  
17 No patients were involved in development of the research question or the design of the study. There  
18  
19 are no plans to disseminate the results of the research to study participants.  
20  
21  
22  
23

## 24 25 **Results**

### 26 27 *Populations and baseline characteristics*

28  
29 As described in table 1, populations ranged in size from 193,882 (Salford 2012) to 482,444 people  
30  
31 (Grampian 2012) (table 3). Crude reported population mortality rates were higher in Swansea than  
32  
33 Grampian and Salford, as was the incidence of people starting long term RRT. The recognition of  
34  
35 diabetes and cardiovascular diseases in incentivised GP registers was similar across the populations.  
36  
37

38  
39  
40 Table 2 shows the baseline characteristics of extracted datasets after harmonised data cleaning. The  
41  
42 percentage of people with at least two tests no more than 365 days apart varied from 17 – 25% with  
43  
44 the fewest in the earliest dataset (Grampian 2003). There was a greater proportion of people tested  
45  
46 with renal impairment (estimated glomerular filtration rate, eGFR <60 ml/min/1.73m<sup>2</sup>) in 2007  
47  
48 compared to the other years of study.  
49  
50  
51  
52  
53  
54  
55  
56  
57

### *Incidence of AKI episodes*

Table 3 and figure 2 show the differences in crude and standardised rates of AKI episodes for each dataset. A minority of people had more than one AKI episode in the index year. For reporting AKI episode rates (table 3) all episodes are included, whereas for reporting phenotypes of people with an AKI episode, the first episode is described (bottom of table 3 and table 4). Crude AKI rates varied with the lowest in Salford 2012 and highest rate in Swansea 2007 (124-151 per 10,000/year, p value = 0.095). Standardisation by age and sex accounted for residual differences (142-151 per 10,000/year, p value = 0.257). Age and sex standardised AKI rates varied little between Grampian 2003, 2007 and 2012 (146-151 per 10,000/year).

As shown in figure 3, the pattern of variation in crude AKI rates was the same when narrower interpretations of KDIGO AKI criteria were used, comparing only blood tests in the prior 2 and 7 days. Table 4 shows this pattern was also similar when analysis was limited to each individual component of the AKI criteria, or within strata of baseline eGFR. In addition, across all populations, the proportion of people developing AKI in the index year increased substantially with increasing age and lower eGFR.

### *AKI phenotypes*

Table 4 describes the first AKI episode for people with an AKI episode during the index year. As well as having the highest crude AKI rate, a greater proportion of those with AKI in Swansea were older, had baseline eGFR <60 ml/min/1.73m<sup>2</sup> (37.6%), had a severe AKI episode (15.4% stage 3) had non-recovery at 90 days (45.1%). In Grampian between 2003 and 2012 there was a steady improvement in the proportion of people with renal recovery 90 days after AKI from 42% to 49%.

### *Further sources of variation*

In addition to assessing for age, sex and case-mix differences, we evaluated the blood testing patterns and clinical location contexts of each dataset (figure 4). Figure 4A shows the frequency of blood tests taken grouped by location: hospital inpatient or outpatient/community. Figure 4B shows the proportion of people with blood tests in close succession. In Grampian from 2003 to 2012, community blood testing increased over time but the frequency of hospital inpatient testing remained unchanged. Test location was not available in Salford, but the proportions of people with two blood tests no more than 2 and 7 days apart was lower than in Grampian and Swansea. Figure 1 shows the conceptual framework for understanding these sources of variation.

### **Discussion**

To our knowledge, this is the first multicentre study to systematically evaluate the extent of and reasons for regional and temporal variation in population rates of AKI, using a harmonised methodological approach. There were differences in the crude rates of AKI between datasets, but after accounting for age and sex, standardised rates were strikingly similar (at 140-150 episodes per 10,000/year, or ~1.5% of the population). The consistently high proportion of people aged over 70 developing AKI was also striking (>5%). This analysis shows the importance of both harmonised methods and standardisation for case-mix prior to any between centre comparisons for description of variation in AKI.

Our analysis provides additional insight into previous reports of a rising AKI incidence in studies based on hospital episode codes or differing AKI definitions<sup>[10]</sup>. Applying the same KDIGO-based AKI definition to data from the same region, over a ten-year span (2003-2012), the standardised AKI rates in Grampian changed little. Notably, this stability was in spite of an increasing frequency of outpatient/community testing in Grampian (whereas the frequency of hospital inpatient testing changed little over the same period). Our analysis also showed a pattern of AKI phenotypes that was



1  
2  
3 consistent with case-mix differences between regions. Swansea, which had the highest all-cause  
4 population mortality, also had the highest proportion of AKI phenotypes for severity, AKI  
5 progression, and non-recovery.  
6  
7  
8  
9

10  
11 Between population variation in the prevalence of kidney disease has previously been described for  
12 CKD in Ireland<sup>[37]</sup>, Germany<sup>[38]</sup> and Taiwan<sup>[39]</sup>, as have variation *between* European countries<sup>[40]</sup>. In  
13 our analysis, we have now shown that much of the regional variation in AKI between UK regions can  
14 be eliminated by harmonising methods, definitions and correcting for age and sex differences. The  
15 stability we report in the AKI incidence over multiple time points in a ten year period is contrary to  
16 previous studies from the UK and North America<sup>[10]</sup>. Given the precautions that we took to minimise  
17 heterogeneity, it is possible that some differences reported in previous studies represent a  
18 methodological artefact (e.g. data capture or case-mix). Consistent with our findings, a recent study  
19 of hospital based AKI among people admitted to the Mayo Clinic also found no significant change in  
20 AKI rates between 2006-2014 using a consistent creatinine change AKI definition across each year  
21 and stratifying by age and sex<sup>[41]</sup>. Furthermore, in our analysis the pattern of differences in crude AKI  
22 rates was robust to modifications of KDIGO criteria using shorter look-back periods.  
23  
24  
25  
26  
27  
28  
29  
30  
31  
32  
33  
34  
35  
36  
37

38 Our study has caveats common to observational studies, which we have highlighted in a conceptual  
39 model that explains the reasons for observed variation in AKI rates (figure 1). In particular, even  
40 though we utilised data from three regions with the same social healthcare system (the UK National  
41 Health Service), we encountered incomplete population data capture that led to the exclusion of a  
42 fourth region from the study. As we note in figure 1, differences in population capture arising out of  
43 incomplete data extraction are not necessarily visible to researchers analysing anonymised large  
44 datasets. This serves as a critical caution for researchers and policy-makers to avoid making  
45 simplistic assumptions that data from different regions are necessarily comparable when they are  
46 derived from different sources. We note that while we have used data from GP registers to provide  
47  
48  
49  
50  
51  
52  
53  
54  
55  
56  
57

1  
2  
3 contextual information on the populations, these data need to be interpreted carefully as they  
4  
5 reflect recording practices in primary care rather than solely disease burden. We also note that while  
6  
7 data from three UK regions were included in our study, this is insufficient to describe variation for  
8  
9 the whole of the UK and other countries. This article represents a first step towards more  
10  
11 harmonised comparisons of AKI across populations. We have shared our code with this article  
12  
13 (<https://github.com/RenalHDRUK>) and now invite researchers working with population datasets in  
14  
15 other regions to add to our experience.  
16  
17  
18

19  
20 In conclusion, our analysis shows the need for a robust methodological approach and recognition of  
21  
22 case-mix differences when evaluating between-centre and temporal trends in AKI. The sharing of  
23  
24 code is key to this approach and we have made our code from this article available for researchers  
25  
26 to use. Using this approach we show strikingly similar rates of AKI across different populations from  
27  
28 England, Scotland and Wales over a ten year period. A consistently high burden of AKI is apparent  
29  
30 with an estimated 1.5% of the UK population experiencing AKI each year, rising to more than 5% per  
31  
32 year in the elderly. Current quality initiatives should adopt these methods or similar methods when  
33  
34 evaluating the impact of changes in practice on the burden of AKI.  
35  
36  
37  
38

### 39 **Contributors**

40  
41 CB, SF, SS and SV conceived the study. AM, GD, HR, HH, MJ and SS contributed to collection of the  
42  
43 data. AM, CB, HH, HR, JC, NP, PF, PR, SS, SV, TS and SF contributed to analysis of the data. AM, CB,  
44  
45 DN, EMH, GD, HH, HR, JC, MJ, NH, NP, PF, PR, RL, SS, SV, TS and SF contributed to interpretation of  
46  
47 the data. SS and SF drafted the manuscript with input from AM, CB, DN, EMH, GD, HH, HR, JC, MJ,  
48  
49 NH, NP, PF, PR, RL, SV and TS. All authors approved the final version.  
50  
51  
52  
53  
54  
55  
56  
57  
58  
59  
60

### **Acknowledgements**

We would like to acknowledge all the data providers who make anonymised data available for research. This study makes use of anonymised data held in the Secure Anonymised Information Linkage (SAIL) system, which is part of the national e-health records research infrastructure for Wales. We thank the Salford Integrated Record (SIR) board for providing us with the 2014 release of the SIR used in this study.

### **Funding**

This work was funded by a grant from the UK's Farr Institute for Health Informatics Research (UKHIRN/XFarrRP001). The Farr Institute is supported by a 10-funder consortium: Arthritis Research UK, the British Heart Foundation, Cancer Research UK, the Economic and Social Research Council, the Engineering and Physical Sciences Research Council, the Medical Research Council, the National Institute of Health Research, the National Institute for Social Care and Health Research (Welsh Assembly Government), the Chief Scientist Office (Scottish Government Health Directorates), and the Wellcome (MRC Grant Nos: CIPHER MR/K006525/1, HeRC MR/K006665/1, London MR/K006584/1, Scotland MR/K007017/1). We also acknowledge the data management support of Grampian Data Safe Haven (DaSH) and the associated financial support of NHS Research Scotland, through NHS Grampian investment in the Grampian DaSH. Work on this project was also part funded by the National Institute for Health Research (NIHR) Collaboration for Leadership in Applied Health Research and Care (CLAHRC) Wessex and Health Care and Research Wales. SS is supported by a research training fellowship from the Wellcome Trust to study the outcomes of acute kidney injury (WT102729/Z/13/Z). The funders of this study had no role in study design; collection, analysis, and interpretation of data; writing the report; or the decision to submit the report for publication.

### Competing Interests

All authors have completed the ICMJE uniform disclosure form at [www.icmje.org/coi\\_disclosure.pdf](http://www.icmje.org/coi_disclosure.pdf) and declare: DN reports grants from Informatica, for analyses of the National CKD Audit which was tendered by HQIP (funding from NHS Wales and NHS England), outside the submitted work. SS is supported by a research training fellowship from the Wellcome Trust to study the outcomes of acute kidney injury (WT102729/Z/13/Z). No other support from any organisation for the submitted work; no other financial relationships with any organisations that might have an interest in the submitted work in the previous three years; no other relationships or activities that could appear to have influenced the submitted work.

### Ethical Approval

Permission for the use of Grampian biochemistry data using routine biochemistry to identify AKI was provided by University of Aberdeen Sponsor, NHS Grampian Caldicott, respective data custodians, NHS Privacy Advisory Committee (ref PAC 33/14), NHS Research and Development Office (project no. 2014RM003) and National Research Ethics Service (reference 14/NW/1371). Permission to analyse SIR data was granted to North West eHealth via the SIR approval board in 2012, which incorporates the appropriate information governance. Further ethical approval was not required, due to the anonymised nature of the data. We thank the SIR board for providing us with the 2014 release of the SIR used in this study. Permissions for using the SAIL databank were gained through application for the SAIL 0505 project, looking at acute kidney injury in Wales. This was reviewed by the Information governance review panel (IGRP) which contains members of the British Medical Association (BMA), National Research Ethics Service (NRES), public health Wales, NHS Wales informatics service (NWIS) and consumer panel.

### Data Sharing

No additional data available. Analysis code is freely available from <https://github.com/RenalHDRUK>.

### Transparency declaration

The lead author (SS) affirms that the manuscript is an honest, accurate, and transparent account of the study being reported; that no important aspects of the study have been omitted; and that any discrepancies from the study as planned have been explained.

### References

- [1] Chertow GM, Burdick E, Honour M, Bonventre JV, Bates DW. Acute Kidney Injury, Mortality, Length of Stay, and Costs in Hospitalized Patients. *Journal of the American Society of Nephrology* 2005;16(11):3365-3370.
- [2] Hsu RK, Siew ED. The growth of AKI: half empty or half full, it's the size of the glass that matters. *Kidney international* 2017;92(3):550-553.
- [3] Ali T, Khan I, Simpson W, Prescott G, Townend J, Smith W, et al. Incidence and Outcomes in Acute Kidney Injury: A Comprehensive Population-Based Study. *Journal of the American Society of Nephrology* 2007;18(4):1292-1298.
- [4] Hsu C, McCulloch C, Fan D, Ordonez J, Chertow G, Go A. Community-based incidence of acute renal failure. *Kidney international* 2007;72(2):208-212.
- [5] Sawhney S, Fluck N, Marks A, Prescott G, Simpson W, Tomlinson L, et al. Acute kidney injury—how does automated detection perform? *Nephrology Dialysis Transplantation* 2015;30(11):1853-1861.
- [6] Waikar SS, Curhan GC, Wald R, McCarthy EP, Chertow GM. Declining mortality in patients with acute renal failure, 1988 to 2002. *Journal of the American Society of Nephrology* 2006;17(4):1143-1150.
- [7] Bedford M, Stevens P, Wheeler T, Farmer C. What is the real impact of acute kidney injury? *BMC Nephrology* 2014;15(1):95.
- [8] Kolhe NV, Muirhead AW, Wilkes SR, Fluck RJ, Taal MW. The epidemiology of hospitalised acute kidney injury not requiring dialysis in England from 1998 to 2013: retrospective analysis of hospital episode statistics. *International journal of clinical practice* 2016;70(4):330-339.

- 1  
2  
3 [9] Hayward JS, McArthur E, Nash DM, Sontrop JM, Russell SJ, Khan S, et al. Kidney Disease Among  
4 Registered Métis Citizens of Ontario: A Population-Based Cohort Study. *Canadian Journal of Kidney*  
5 *Health and Disease* 2017;4:2054358117703071.  
6  
7 [10] Siew ED, Davenport A. The growth of acute kidney injury: a rising tide or just closer attention to  
8 detail? *Kidney international* 2015;87(1):46-61.  
9  
10 [11] Van Biesen W, Vanholder R, Lameire N. Defining Acute Renal Failure: RIFLE and Beyond. *Clinical*  
11 *Journal of the American Society of Nephrology* 2006;1(6):1314-1319.  
12  
13 [12] Bellomo R, Ronco C, Kellum J, Mehta R, Palevsky P, the Aw. Acute renal failure - definition,  
14 outcome measures, animal models, fluid therapy and information technology needs: the Second  
15 International Consensus Conference of the Acute Dialysis Quality Initiative (ADQI) Group. *Critical*  
16 *Care* 2004;8(4):R204-R212.  
17  
18 [13] Mehta RL, Kellum JA, Shah SV, Molitoris BA, Ronco C, Warnock DG, et al. Acute Kidney Injury  
19 Network: report of an initiative to improve outcomes in acute kidney injury. *Critical care*  
20 2007;11(2):R31.  
21  
22 [14] Kidney Disease: Improving Global Outcomes (KDIGO) Acute Kidney Injury Work Group. KDIGO  
23 Clinical Practice Guideline for Acute Kidney Injury. *Kidney international* 2012;2:1-138.  
24  
25 [15] Lafrance JP, Miller DR. Defining acute kidney injury in database studies: the effects of varying  
26 the baseline kidney function assessment period and considering CKD status. *American Journal of*  
27 *Kidney Diseases* 2010;56(4):651-660.  
28  
29 [16] Stewart J, Findlay G, Smith N, Kelly K, Mason M. Adding Insult to Injury: A review of the care of  
30 patients who died in hospital with a primary diagnosis of acute kidney injury. London: National  
31 Confidential Inquiry into Patient Outcome and Death.; 2009.  
32  
33 [17] Silver SA, Adu D, Agarwal S, Gupta KL, Lewington AJP, Pannu N, et al. Strategies to Enhance  
34 Rehabilitation After Acute Kidney Injury in the Developing World. *Kidney International Reports*  
35 2017;2(4):579-593.  
36  
37 [18] Think Kidneys. Think Kidneys. 2015; Available at: <https://www.thinkkidneys.nhs.uk/>. Accessed  
38 07/04, 2017.  
39  
40 [19] Mehta R, Bagga A, Patibandla R, Chakravarthi R. Detection and Management of AKI in the  
41 Developing World: The 18th Acute Disease Quality Initiative (ADQI) International Consensus  
42 Conference. *Kidney International Reports* 2017;2(4):515-518.  
43  
44 [20] Mehta RL, Cerda J, Burdmann EA, Tonelli M, Garcia-Garcia G, Jha V, et al. International Society  
45 of Nephrology's Oby25 initiative for acute kidney injury (zero preventable deaths by 2025): a human  
46 rights case for nephrology. *Lancet* 2015;385(9987):2616-2643.  
47  
48 [21] Sawhney S, Fluck N, Fraser SD, Marks A, Prescott GJ, Roderick PJ, et al. KDIGO-based acute  
49 kidney injury criteria operate differently in hospitals and the community—findings from a large  
50 population cohort. *Nephrology Dialysis Transplantation* 2016;31(6):922-929.  
51  
52 [22] Uchino S, Bellomo R, Bagshaw SM, Goldsmith D. Transient azotaemia is associated with a high  
53 risk of death in hospitalized patients. *Nephrology Dialysis Transplantation* 2010;25(6):1833-1839.  
54  
55  
56  
57  
58  
59  
60

1  
2  
3 [23] Sawhney S, Mitchell M, Marks A, Fluck N, Black C. Long-term prognosis after acute kidney injury  
4 (AKI): what is the role of baseline kidney function and recovery? A systematic review. *BMJ Open*  
5 2015;5(1):e006497.

6  
7 [24] Playford CJ, Gayle V, Connelly R, Gray AJG. Administrative social science data: The challenge of  
8 reproducible research. *Big Data & Society* 2016;3(2):2053951716684143.

9  
10 [25] Bagshaw SM, Goldstein SL, Ronco C, Kellum JA. Acute kidney injury in the era of big data: the  
11 15th Consensus Conference of the Acute Dialysis Quality Initiative (ADQI). *Canadian Journal of*  
12 *Kidney Health and Disease* 2016;3(1):1-5.

13  
14 [26] NHS England. Patient safety alert on standardising the early identification of Acute Kidney  
15 Injury. 2014; Available at: <http://www.england.nhs.uk/2014/06/09/psa-aki/>. Accessed 07/04, 2017.

16  
17 [27] Sawhney S, Marks A, Fluck N, Levin A, Prescott GJ, Black C. Intermediate and Long-Term  
18 Outcomes of Survivors of Acute Kidney Injury Episodes: A Large Population-Based Cohort Study.  
19 *American Journal of Kidney Diseases* 2017;69(1):18-28.

20  
21 [28] Sawhney S, Marks A, Fluck N, Levin A, McLernon D, Prescott G, et al. Post-discharge kidney  
22 function is associated with subsequent ten-year renal progression risk among survivors of acute  
23 kidney injury. *Kidney international* 2017;92(2):440-452.

24  
25 [29] Kidney Disease: Improving Global Outcomes (KDIGO) CKD Work Group. KDIGO Clinical Practice  
26 Guideline for the Evaluation and Management of Chronic Kidney Disease. *Kidney international*  
27 2013;3:1-150.

28  
29 [30] Yancy CW, Jessup M, Bozkurt B, Butler J, Casey DE, Drazner MH, et al. 2013 ACCF/AHA Guideline  
30 for the Management of Heart Failure. *Circulation* 2013;128(16):e240.

31  
32 [31] Guideline Development Group, Bilo H, Coentrao L, Couchoud C, Covic A, De Sutter J, et al.  
33 Clinical Practice Guideline on management of patients with diabetes and chronic kidney disease  
34 stage 3b or higher (eGFR <45 mL/min). *Nephrology Dialysis Transplantation* 2015;30:ii1-ii142.

35  
36 [32] Fraccaro P, van der Veer SN, Brown B, Prosperi M, O'Donoghue D, Collins GS, et al. An external  
37 validation of models to predict the onset of chronic kidney disease using population-based electronic  
38 health records from Salford, UK. *BMC Medicine* 2016;14(1):104.

39  
40 [33] Ford DV, Jones KH, Verplancke J, Lyons RA, John G, Brown G, et al. The SAIL Databank: building a  
41 national architecture for e-health research and evaluation. *BMC Health Services Research*  
42 2009;9(1):157.

43  
44 [34] Lyons RA, Jones KH, John G, Brooks CJ, Verplancke J, Ford DV, et al. The SAIL databank: linking  
45 multiple health and social care datasets. *BMC Medical Informatics and Decision Making* 2009;9(1):3.

46  
47 [35] Levey AS, Stevens LA, Schmid CH, Zhang Y, Castro AF, Feldman HI, et al. A New Equation to  
48 Estimate Glomerular Filtration Rate. *Annals of Internal Medicine* 2009;150(9):604-612.

49  
50 [36] Roalfe AK, Holder RL, Wilson S. Standardisation of rates using logistic regression: a comparison  
51 with the direct method. *BMC Health Services Research* 2008;8(1):275.

1  
2  
3 [37] Stack AG, Casserly LF, Cronin CJ, Chernenko T, Cullen W, Hannigan A, et al. Prevalence and  
4 variation of Chronic Kidney Disease in the Irish health system: initial findings from the National  
5 Kidney Disease Surveillance Programme. BMC Nephrology 2014;15(1):185.  
6

7 [38] Aumann N, Baumeister SE, Rettig R, Lieb W, Werner A, Doring A, et al. Regional Variation of  
8 Chronic Kidney Disease in Germany: Results From Two Population-Based Surveys. Kidney and Blood  
9 Pressure Research 2015;40(3):231-243.  
10

11 [39] Yap Y, Chuang K, Chiang C, Chuang H, Lu S. Geographic Variation of Chronic Kidney Disease  
12 Prevalence: Correlation with the Incidence of Renal Cell Carcinoma or Urothelial Carcinoma? BioMed  
13 Research International 2015;2015:427084.  
14

15 [40] Brück K, Stel VS, Gambaro G, Hallan S, Völzke H, Ärnlöv J, et al. CKD Prevalence Varies across the  
16 European General Population. Journal of the American Society of Nephrology 2016;27(7):2135-2147.  
17

18 [41] Kashani K, Shao M, Li G, Williams AW, Rule AD, Kremers WK, et al. No increase in the incidence  
19 of acute kidney injury in a population-based annual temporal trends epidemiology study. Kidney  
20 international 2017;(in press).  
21  
22  
23  
24  
25  
26  
27  
28  
29  
30  
31  
32  
33  
34  
35  
36  
37  
38  
39  
40  
41  
42  
43  
44  
45  
46  
47  
48  
49  
50  
51  
52  
53  
54  
55  
56  
57  
58  
59  
60



## Tables and Figures

Table 1 – Contextual information on the populations in this study

|                                                                                    | Grampian 2003                                                        | Grampian 2007                                                        | Grampian 2012                                                        | Swansea 2007                                                                                        | Salford 2012                                                                                        |
|------------------------------------------------------------------------------------|----------------------------------------------------------------------|----------------------------------------------------------------------|----------------------------------------------------------------------|-----------------------------------------------------------------------------------------------------|-----------------------------------------------------------------------------------------------------|
| Index year for assessing incident AKI episodes                                     | 2003                                                                 | 2007                                                                 | 2012                                                                 | 2007                                                                                                | 2012                                                                                                |
| Mid-year regional population (all ages) during index year <sup>1</sup>             | 529,360                                                              | 548,290                                                              | 573,400                                                              | 499,400                                                                                             | 237,085                                                                                             |
| Mid-year regional adult population (age ≥ 15 years) during index year <sup>1</sup> | 438,332                                                              | 458,900                                                              | 482,444                                                              | 415,500                                                                                             | 193,882                                                                                             |
| Percentage of population in urban settlements of > 10,000 people <sup>2</sup>      | 49.3%                                                                | 51.8%                                                                | 52.1%                                                                | 81.7%                                                                                               | 99.9%                                                                                               |
| Regional crude all-cause mortality rate ages 15+ (index year/100,000) <sup>1</sup> | 1192                                                                 | 1154                                                                 | 1093                                                                 | 1334                                                                                                | 1135                                                                                                |
| Crude adult incidence of chronic RRT per million population (UKRR) <sup>3</sup>    | 98                                                                   | 102                                                                  | 93                                                                   | 167                                                                                                 | 85                                                                                                  |
| Prevalence of chronic kidney disease per 100 people (QOF) <sup>4</sup>             | n/a <sup>5</sup>                                                     | 2.6                                                                  | 3.3                                                                  | 1.8                                                                                                 | 3.0                                                                                                 |
| Prevalence of coronary heart disease per 100 people (QOF) <sup>4</sup>             | 4.1                                                                  | 4.0                                                                  | 3.9                                                                  | 4.1                                                                                                 | 3.9                                                                                                 |
| Prevalence of diabetes registration per 100 people (QOF) <sup>4</sup>              | 3.0                                                                  | 3.3                                                                  | 4.2                                                                  | 4.3                                                                                                 | 4.5                                                                                                 |
| Prevalence of heart failure registration per 100 people (QOF) <sup>4</sup>         | n/a <sup>4</sup>                                                     | 0.8                                                                  | 0.8                                                                  | 1.0                                                                                                 | 0.9                                                                                                 |
| Prevalence of hypertension registration per 100 people (QOF) <sup>4</sup>          | 11.0                                                                 | 11.7                                                                 | 13.2                                                                 | 12.5                                                                                                | 13.8                                                                                                |
| Prevalence of stroke & TIA registration per 100 people (QOF) <sup>4</sup>          | 1.6                                                                  | 1.7                                                                  | 1.9                                                                  | 2.1                                                                                                 | 1.8                                                                                                 |
| Number of biochemistry departments for whole region                                | One department covers in and outpatient, community and private tests | One department covers in and outpatient, community and private tests | One department covers in and outpatient, community and private tests | Four departments cover in and outpatients, community and private tests                              | One department covers in and outpatient and community tests. Privately obtained samples unavailable |
| Means of excluding samples belonging to people on long term RRT from dataset       | Link to Scottish Renal Registry                                      | Link to Scottish Renal Registry                                      | Link to Scottish Renal Registry                                      | Removing samples from locations where renal replacement is performed, including intensive care unit | Read code screening                                                                                 |
| IDMS aligned creatinine assay                                                      | Yes                                                                  | Yes                                                                  | Yes                                                                  | From 2007                                                                                           | Yes                                                                                                 |

<sup>1</sup>From the Office of National Statistics

<sup>2</sup>From the 2011 National Census in England and Wales and Scottish Government Urban Rural Classification

<sup>3</sup>From the UK Renal Registry (UKRR) annual reports

<sup>4</sup>Quality Outcomes Framework (QOF) data is incentivised information entered by GP practices. Not recorded in Grampian in 2003, for which 2004 data is provided where available.

<sup>5</sup>Data not available

Table 2 – Baseline characteristics for each dataset

|                                                                                                           | Grampian 2003 |                     | Grampian 2007 |         | Grampian 2012 |         | Swansea 2007  |         | Salford 2012  |         |
|-----------------------------------------------------------------------------------------------------------|---------------|---------------------|---------------|---------|---------------|---------|---------------|---------|---------------|---------|
|                                                                                                           | Patient total | (%) <sup>1</sup>    | Patient total | (%)     | Patient total | (%)     | Patient total | (%)     | Patient total | (%)     |
| Adult resident population (aged ≥ 15)                                                                     | 438332        |                     | 458900        |         | 482444        |         | 415500        |         | 193882        |         |
| <b>Population ascertainment of renal impairment (eGFR &lt; 60 ml/min/1.73m<sup>2</sup>) in index year</b> |               |                     |               |         |               |         |               |         |               |         |
| No tests during index year                                                                                | 311922        | (71.2)              | 303673        | (66.2)  | 301992        | (62.6)  | 253531        | (61.0)  | 116977        | (60.3)  |
| eGFR ≥60 <sup>2</sup>                                                                                     | 101595        | (23.2)              | 120854        | (26.3)  | 158736        | (32.9)  | 129959        | (31.3)  | 66890         | (34.5)  |
| eGFR <60 <sup>2</sup>                                                                                     | 24805         | (5.7)               | 34373         | (11.3)  | 21716         | (4.5)   | 32010         | (7.7)   | 10015         | (5.2)   |
| <b>Sufficiency of tests to enable AKI detection</b>                                                       |               |                     |               |         |               |         |               |         |               |         |
| People with no tests during index year                                                                    | 311922        | (71.2)              | 303673        | (66.2)  | 301992        | (62.6)  | 253531        | (61.0)  | 116977        | (60.3)  |
| People with insufficient tests                                                                            | 52602         | (12.0)              | 57788         | (12.6)  | 69239         | (14.4)  | 59839         | (14.4)  | 31467         | (16.2)  |
| People with ≥2 tests within 365 days                                                                      | 73808         | (16.8)              | 97439         | (21.2)  | 111213        | (23.1)  | 102130        | (24.6)  | 45438         | (23.4)  |
| <b>Characteristics of people with ≥ 2 tests within 365 days</b>                                           |               |                     |               |         |               |         |               |         |               |         |
| Proportion female                                                                                         | 40413         | (54.8)              | 53061         | (54.5)  | 60330         | (54.2)  | 55685         | (54.5)  | 24723         | (54.4)  |
| Median age (IQR)                                                                                          | 63            | (48-74)             | 63            | (50-75) | 63            | (49-74) | 64            | (51-75) | 63            | (49-74) |
| eGFR <60 <sup>2</sup>                                                                                     | 18573         | (25.2) <sup>3</sup> | 28274         | (29.0)  | 18679         | (20.2)  | 25952         | (25.4)  | 8541          | (18.8)  |

<sup>1</sup> Expressed as a percentage of total residents unless specified otherwise

<sup>2</sup> First estimated glomerular filtration rate in index year (ml/min/1.73m<sup>2</sup>)

<sup>3</sup> Expressed as a percentage of people with ≥ 2 tests within 365 days

Table 3 – Crude and standardised rates of AKI episodes, and components of AKI criteria

|                                                                                                                                                          | Grampian 2003                  | Grampian 2007       | Grampian 2012       | Swansea 2007        | Salford 2012        |
|----------------------------------------------------------------------------------------------------------------------------------------------------------|--------------------------------|---------------------|---------------------|---------------------|---------------------|
|                                                                                                                                                          | (Rate per 10,000) <sup>1</sup> | (Rate per 10,000)   | (Rate per 10,000)   | (Rate per 10,000)   | (Rate per 10,000)   |
| Adult resident population                                                                                                                                | 438332                         | 458900              | 482444              | 415500              | 193882              |
| <b>AKI incidence rates</b>                                                                                                                               |                                |                     |                     |                     |                     |
| Crude AKI incidence (95% CI)                                                                                                                             | 131.2 (127.7-134.7)            | 138.3 (134.9-141.7) | 139.1 (135.8-142.4) | 151.1 (147.4-154.8) | 124.3 (118.8-129.8) |
| Age-sex standardised AKI incidence (95% CI)                                                                                                              | 147.2 (143.3-151.1)            | 150.6 (146.9-154.3) | 146.3 (142.8-149.8) | 145.6 (142.0-149.2) | 141.8 (136.2-147.4) |
| Total AKI episodes                                                                                                                                       | 5749 (131)                     | 6346 (138)          | 6711 (139)          | 6266 (151)          | 2399 (124)          |
| People with AKI                                                                                                                                          | 5362 (122)                     | 5930 (129)          | 6277 (130)          | 5847 (141)          | 2208 (114)          |
| <b>Subgroups of people with AKI</b>                                                                                                                      |                                |                     |                     |                     |                     |
| AKI using hospital tests only                                                                                                                            | 4386 (100)                     | 4739 (103)          | 4492 (93)           | 4432 (107)          | n/a <sup>2</sup>    |
| Rigid KDIGO criteria                                                                                                                                     | 3436 (78)                      | 3803 (83)           | 3617 (75)           | 3469 (83)           | 1114 (57)           |
| People meeting 2d criterion                                                                                                                              | 2486 (57)                      | 2831 (62)           | 2714 (56)           | 2424 (58)           | 741 (38)            |
| People meeting 7d criterion                                                                                                                              | 2488 (57)                      | 2698 (56)           | 2664 (55)           | 2611 (63)           | 821 (42)            |
| People meeting 8-90d criterion                                                                                                                           | 2619 (60)                      | 2830 (59)           | 3351 (69)           | 3287 (79)           | 1163 (60)           |
| People meeting 91-365d criterion                                                                                                                         | 1408 (32)                      | 1528 (32)           | 1850 (38)           | 1591 (38)           | 737 (38)            |
| <b>People with AKI in age strata</b>                                                                                                                     |                                |                     |                     |                     |                     |
| ≥70 years                                                                                                                                                | 3205 (562)                     | 3561 (587)          | 3705 (572)          | 3785 (584)          | 1299 (544)          |
| 40-69 years                                                                                                                                              | 1765 (88)                      | 1903 (89)           | 2021 (89)           | 1699 (89)           | 740 (92)            |
| <40 years                                                                                                                                                | 392 (22)                       | 466 (25)            | 551 (29)            | 363 (23)            | 169 (19)            |
| <b>People with AKI in eGFR strata among people with at least two tests within 365 days (rates expressed within strata of tested individuals at risk)</b> |                                |                     |                     |                     |                     |
| Baseline eGFR ≥60                                                                                                                                        | 3612 (654)                     | 3874 (560)          | 4419 (478)          | 3648 (479)          | 1512 (410)          |
| Baseline eGFR 45-59                                                                                                                                      | 809 (673)                      | 940 (496)           | 894 (756)           | 1044 (618)          | 323 (607)           |
| Baseline eGFR 30-44                                                                                                                                      | 597 (1222)                     | 723 (1000)          | 661 (1282)          | 732 (1097)          | 202 (867)           |
| Baseline eGFR <30                                                                                                                                        | 344 (2064)                     | 393 (1861)          | 303 (1781)          | 423 (1778)          | 171 (1921)          |

<sup>1</sup>Rate expressed per 10,000 residents unless specified otherwise<sup>2</sup>Location data not available

Table 4 – Phenotype of AKI episodes

|                                                                   | <b>Grampian 2003</b> | <b>Grampian 2007</b> | <b>Grampian 2012</b> | <b>Swansea 2007</b> | <b>Salford 2012</b> |
|-------------------------------------------------------------------|----------------------|----------------------|----------------------|---------------------|---------------------|
|                                                                   | Total (%)<br>people  | Total (%)<br>people  | Total (%)<br>people  | Total (%)<br>people | Total (%)<br>people |
| <b>People with AKI</b>                                            | 5362                 | 5930                 | 6277                 | 5847                | 2208                |
| Proportion female                                                 | 2899 (54.1)          | 3256 (54.9)          | 3443 (54.9)          | 3195 (54.6)         | 1250 (56.6)         |
| Median age (IQR)                                                  | 73 (61-81)           | 74 (61-82)           | 74 (60-82)           | 76 (64-84)          | 74 (61-83)          |
| <b>Peak AKI severity stage for first episode</b>                  |                      |                      |                      |                     |                     |
| stage 1                                                           | 3720 (69.4)          | 4211 (71.0)          | 4389 (69.9)          | 3720 (63.6)         | 1435 (65.0)         |
| stage 2                                                           | 1014 (18.9)          | 1063 (17.9)          | 1174 (18.7)          | 1224 (20.9)         | 451 (20.4)          |
| stage 3                                                           | 628 (11.7)           | 656 (11.1)           | 714 (11.4)           | 903 (15.4)          | 322 (14.6)          |
| AKI stage progression                                             | 817 (15.2)           | 792 (13.4)           | 850 (13.5)           | 900 (15.4)          | 300 (13.6)          |
| <b>Baseline eGFR for first episode (ml/min/1.73m<sup>2</sup>)</b> |                      |                      |                      |                     |                     |
| ≥60                                                               | 3612 (67.4)          | 3874 (65.3)          | 4419 (70.4)          | 3648 (62.4)         | 1512 (68.5)         |
| 45-59                                                             | 809 (15.1)           | 940 (15.9)           | 894 (14.2)           | 1044 (17.9)         | 323 (14.6)          |
| 30-44                                                             | 597 (11.1)           | 723 (12.2)           | 661 (10.5)           | 732 (12.5)          | 202 (9.1)           |
| <30                                                               | 344 (6.4)            | 393 (6.6)            | 303 (4.8)            | 423 (7.2)           | 171 (7.7)           |
| <b>Prior AKI episodes detected in last 3 years</b>                |                      |                      |                      |                     |                     |
| No prior episodes                                                 | 4415 (82.3)          | 4847 (81.7)          | 5052 (80.5)          | 4824 (82.5)         | 1708 (77.4)         |
| 1 prior episode                                                   | 723 (13.5)           | 833 (14.0)           | 897 (14.3)           | 784 (13.4)          | 349 (15.8)          |
| 2 or more prior episodes                                          | 224 (4.2)            | 250 (4.2)            | 328 (5.2)            | 239 (4.1)           | 151 (6.8)           |
| Prior AKI within 1 year                                           | 414 (7.7)            | 459 (7.7)            | 492 (7.8)            | 488 (8.3)           | 216 (9.8)           |
| <b>Renal recovery to within 20% of baseline</b>                   |                      |                      |                      |                     |                     |
| Renal recovery                                                    | 2239 (41.8)          | 2588 (43.6)          | 3077 (49.0)          | 2156 (36.9)         | 970 (43.9)          |
| Renal non-recovery                                                | 2203 (41.1)          | 2387 (40.3)          | 2245 (35.8)          | 2635 (45.1)         | 820 (37.1)          |
| Repeat samples not available                                      | 920 (17.2)           | 955 (16.1)           | 955 (15.2)           | 1056 (18.1)         | 418 (18.9)          |

<sup>1</sup>Expressed as a percentage of people with at least one AKI episode

<sup>2</sup>Insufficient biochemistry data available to report on the previous 3 years

1  
2  
3  
4  
5  
6  
7  
8  
9  
10  
11  
12  
13  
14  
15  
16  
17  
18  
19  
20  
21  
22  
23  
24  
25  
26  
27  
28  
29  
30  
31  
32  
33  
34  
35  
36  
37  
38  
39  
40  
41  
42  
43  
44  
45  
46  
47  
48  
49  
50  
51  
52  
53  
54  
55  
56  
57  
58  
59  
60

Figure 1 – Conceptual framework for the reasons for cross-population differences in AKI rates

Figure 2 – Crude and age-sex standardised rate of AKI episodes

Figure 3 – Crude AKI rates using different interpretations of the KDIGO-based AKI definition

Figure 4 – Patterns of blood testing by clinical location (4A), and by test regularity (4B)

For peer review only

1  
2  
3  
4  
5  
6  
7  
8  
9  
10  
11  
12  
13  
14  
15  
16  
17  
18  
19  
20  
21  
22  
23  
24  
25  
26  
27  
28  
29  
30  
31  
32  
33  
34  
35  
36  
37  
38  
39  
40  
41  
42  
43  
44  
45  
46  
47  
48  
49  
50  
51  
52  
53  
54  
55  
56  
57  
58  
59  
60

- Factor addressed in this study
- Factor partially addressed in this study
- Factor not addressed in this study

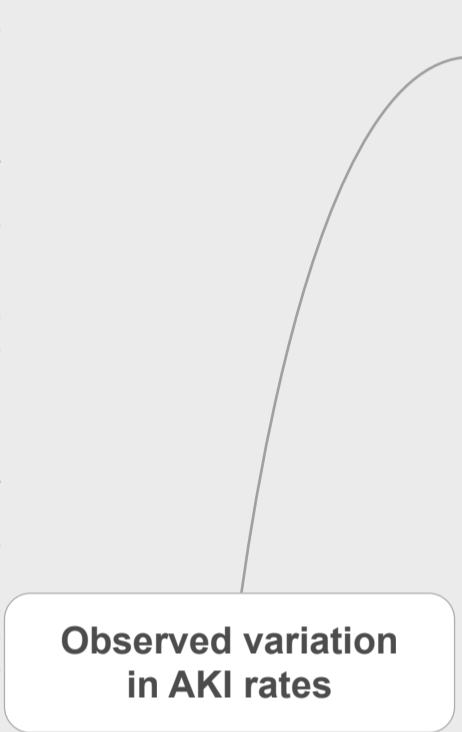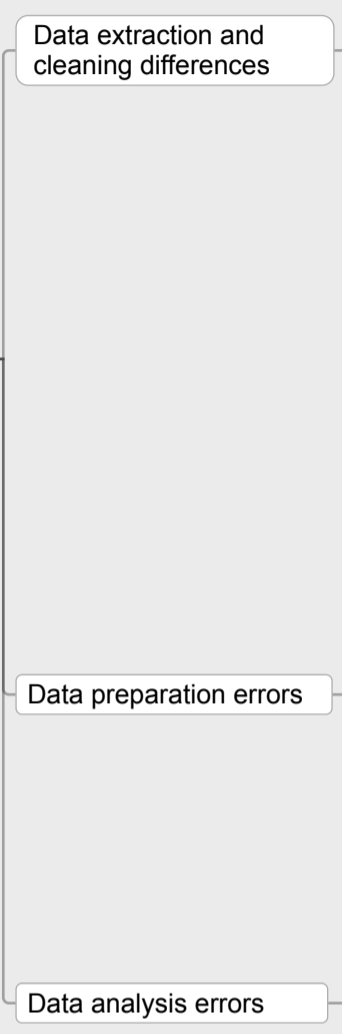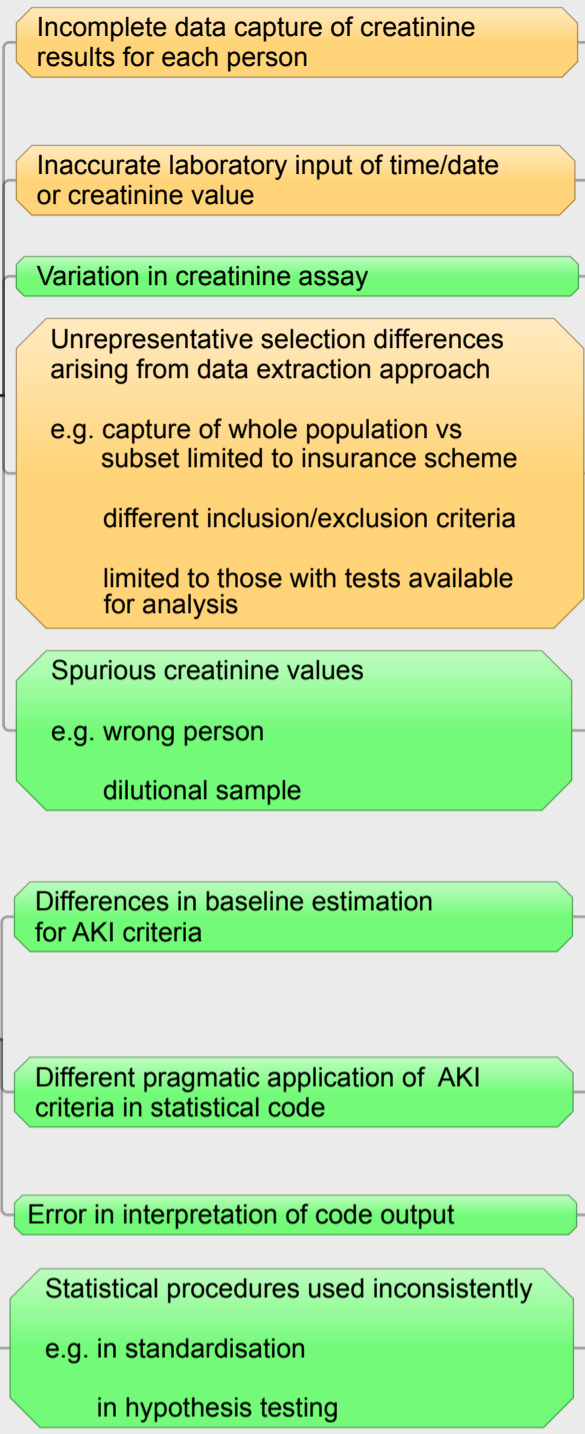

Full biochemistry capture in each region, although errors in data extraction may not be visible to researchers working with de-identified data

Only one sample/day retained to avoid sample order issues  
Extreme improbable values excluded

IDMS aligned serum creatinine used

One region was excluded because it had incomplete population capture

The same data cleaning procedures and code were used in parallel in each region

Only the highest creatinine on each day included

The same KDIGO based AKI criteria were used in each region  
A parsimonious version of AKI criteria without baseline estimation used in a sensitivity analysis

The same AKI episode code was used in parallel in each region  
A mock dataset used to confirm reproducibility of AKI episode code output

A mock dataset used to confirm consistency of interpretation of code

Code was shared for all analyses involving individual patient data  
Analyses on aggregated data performed by the same analyst

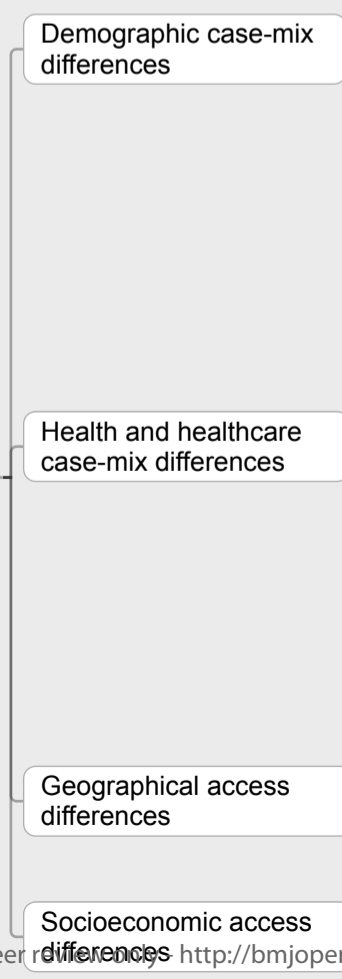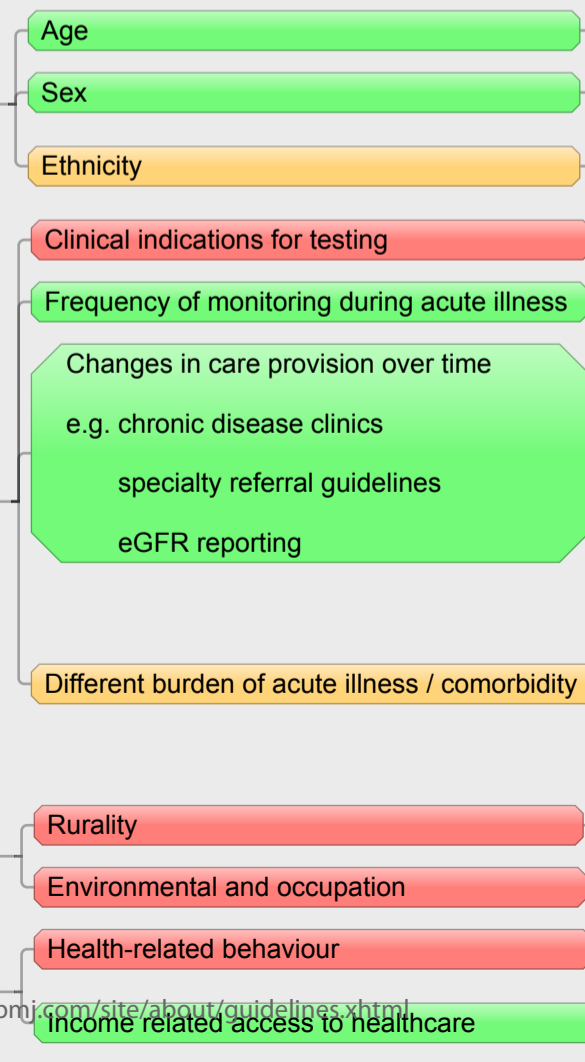

Standardisation performed

Standardisation performed

Data not available, but overwhelmingly caucasian in all datasets

Data not available

Intensity of testing evaluated

Three eras of the Grampian population were evaluated during which these changes occurred

Contextual ecological data were available for population mortality rates, incident chronic RRT and vascular diseases  
Stratification by baseline eGFR was used as a surrogate measure of morbidity and propensity for AKI

Data not available

Data not available

Data not available

All regions provide public healthcare free at the point of use

Dataset (standardised AKI rate)

### BMJ Open

- 1 Grampian 2003 (147.2)
- 2 Grampian 2007 (150.6)
- 3 Grampian 2012 (146.3)
- 4 Swansea 2007 (145.6)
- 5 Salford 2012 (141.8)

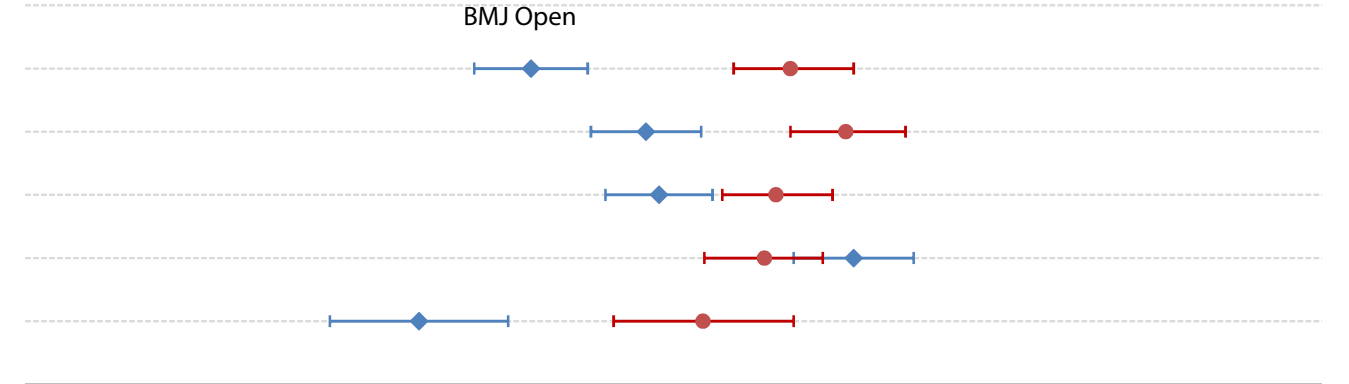

100 120 140 160 180

For peer review only - <http://bmjopen.bmj.com/site/about/guidelines.xhtml>

◆ Crude AKI rate (per 10,000/year)      ● Age and sex standardised AKI rate (per 10,000/year)

# BMJ Open

Dataset / year

- 1 Grampian 2003
- 2
- 3 Grampian 2007
- 4
- 5 Grampian 2012
- 6
- 7 Swansea 2007
- 8
- 9 Salford 2012
- 10
- 11
- 12
- 13
- 14

- Very narrow interpretation (criterion 3, 2 days)
- ◆ Narrow interpretation (criteria 2&3, 7 days)
- Full algorithm (criteria 1-3, 365 days)

For peer review only - <http://bmjopen.bmj.com/site/about/guidelines.xhtml>

Crude AKI rate (per 10,000/year)

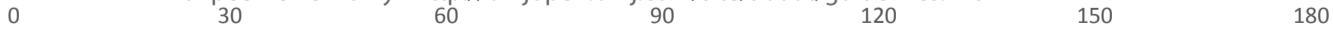



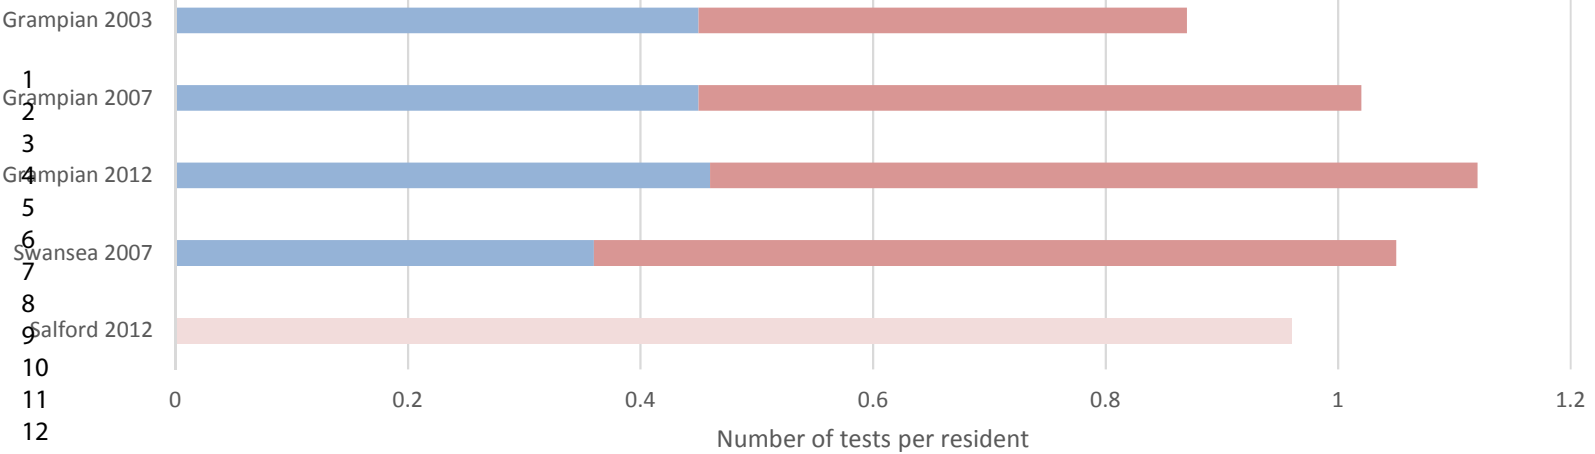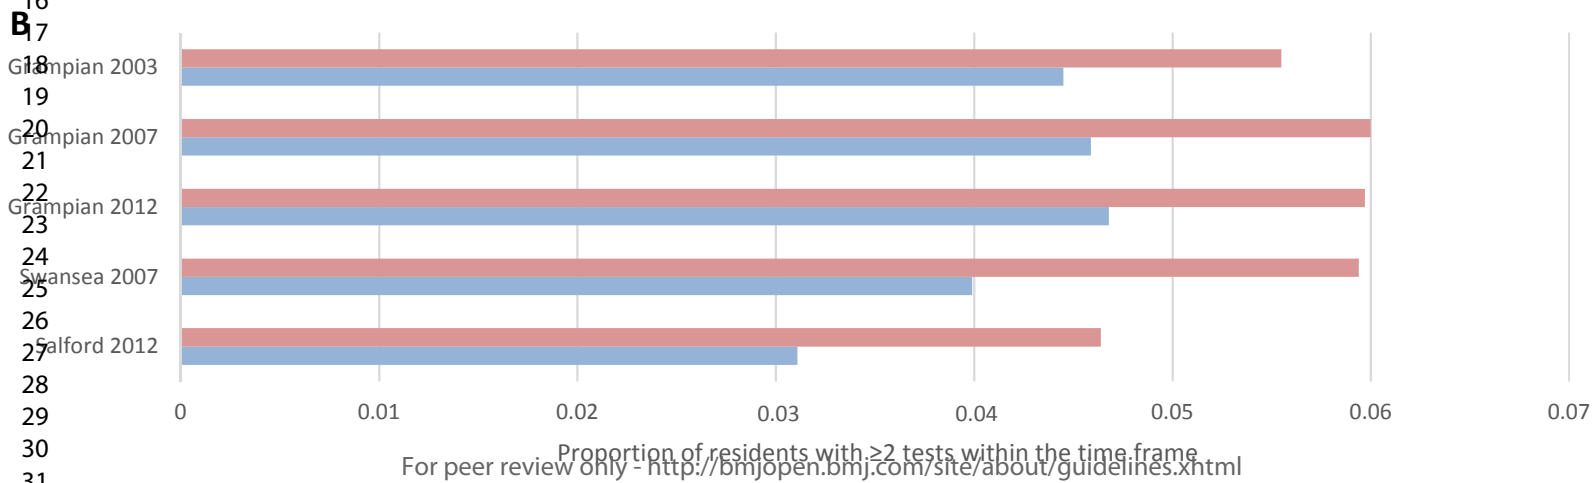

Supplemental table 1 – AKI definition and phenotype criteria for this study

| <b>AKI Criteria</b>        | <b>AKI definition</b>                                                                                                                             |
|----------------------------|---------------------------------------------------------------------------------------------------------------------------------------------------|
| Criterion 1                | Serum creatinine $\geq 1.5$ times higher than the median of all creatinine values 8-90 days ago, or 91-365 days ago if no tests between 8-90 days |
| Criterion 2                | Serum creatinine $\geq 1.5$ times higher than the lowest creatinine within 7 days                                                                 |
| Criterion 3                | Serum creatinine $>26$ $\mu\text{mol/L}$ higher than the lowest creatinine within 48 hours                                                        |
| <b>AKI severity</b>        | <b>Staging definition (based on peak creatinine within 90 days of diagnosis)</b>                                                                  |
| Stage 1                    | Rise in creatinine of $>26$ $\mu\text{mol/L}$ ; or index/baseline ratio $\geq 1.5$ and $<2$                                                       |
| Stage 2                    | Index/baseline ratio $\geq 2$ and $<3$                                                                                                            |
| Stage 3                    | Index/baseline ratio $\geq 3$ ; or $\geq 1.5$ and index creatinine $>354$ $\mu\text{mol/L}$                                                       |
| <b>Prior AKI episodes</b>  | <b>Prior AKI definition</b>                                                                                                                       |
| No prior AKI               | AKI episode not preceded by any previous AKI episodes in the prior 3 years                                                                        |
| Prior AKI                  | AKI episode preceded by at least one previous AKI episode in the prior 3 years                                                                    |
| Recent prior AKI           | AKI episode preceded by at least one previous AKI episode in the prior 1 year                                                                     |
| <b>90 day AKI recovery</b> | <b>Recovery definition</b>                                                                                                                        |
| Recovery                   | Last creatinine within 90 days of AKI $<1.2$ times higher than the baseline creatinine at diagnosis                                               |
| Non-recovery               | Last creatinine within 90 days of AKI $\geq 1.2$ times higher than the baseline creatinine at diagnosis, or still receiving acute RRT             |
| “Untested”                 | No repeat blood tests taken within 90 days of AKI diagnosis                                                                                       |

Abbreviations: AKI, acute kidney injury; RRT, renal replacement therapy

1  
2  
3  
4  
5  
6  
7  
8  
9  
10  
11  
12  
13  
14  
15  
16  
17  
18  
19  
20  
21  
22  
23  
24  
25  
26  
27  
28  
29  
30  
31  
32  
33  
34  
35  
36  
37  
38  
39  
40  
41  
42  
43  
44  
45  
46  
47  
48  
49  
50  
51  
52  
53  
54  
55  
56  
57  
58  
59  
60

Supplementary figure 1 – Map of the UK populations in this analysis

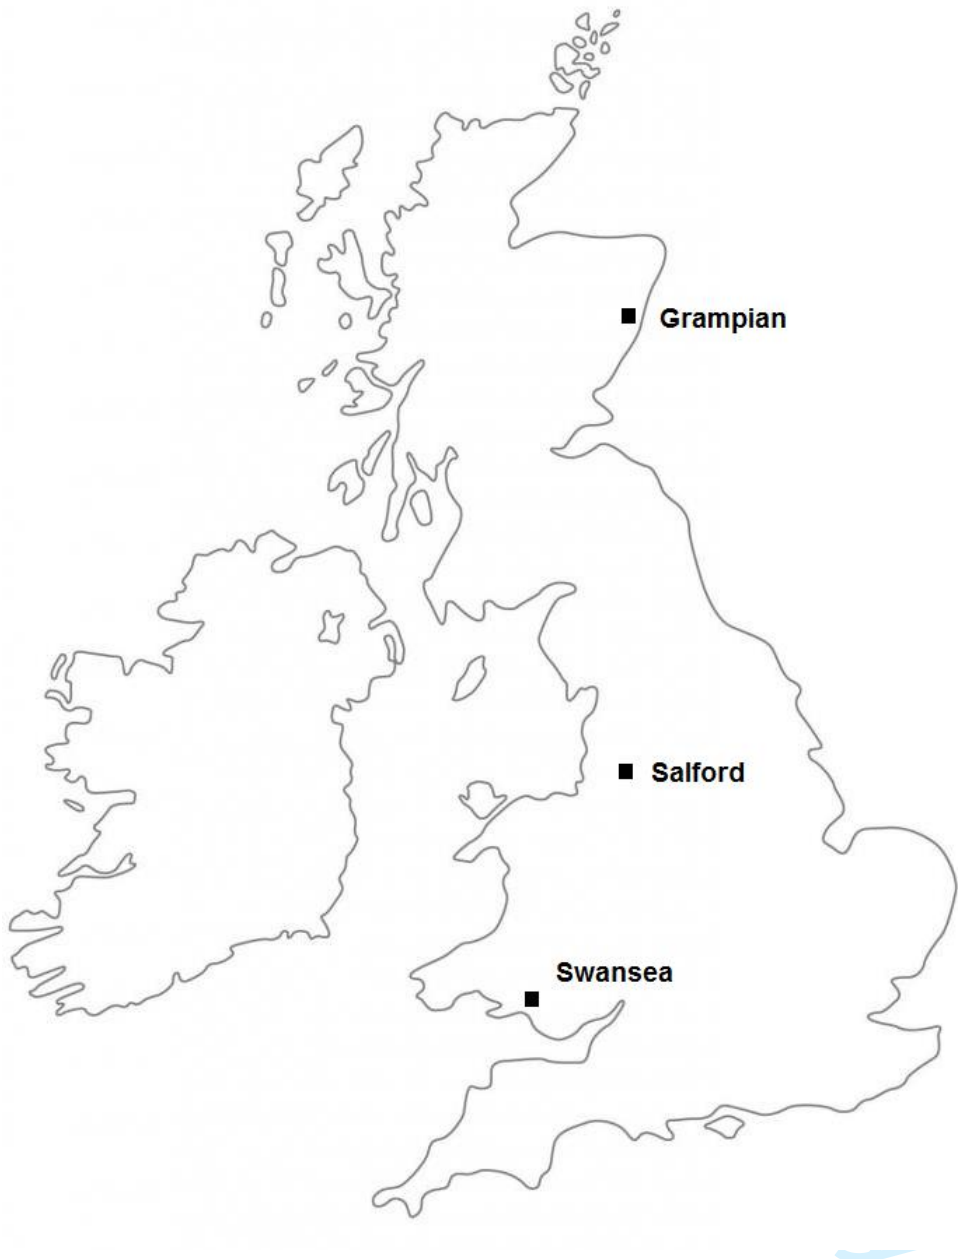

Supplemental figure 2 – Hypothetical patient illustrating look-back (for baseline) and look-forward (for AKI episode phenotyping) time periods from the start of an AKI episode

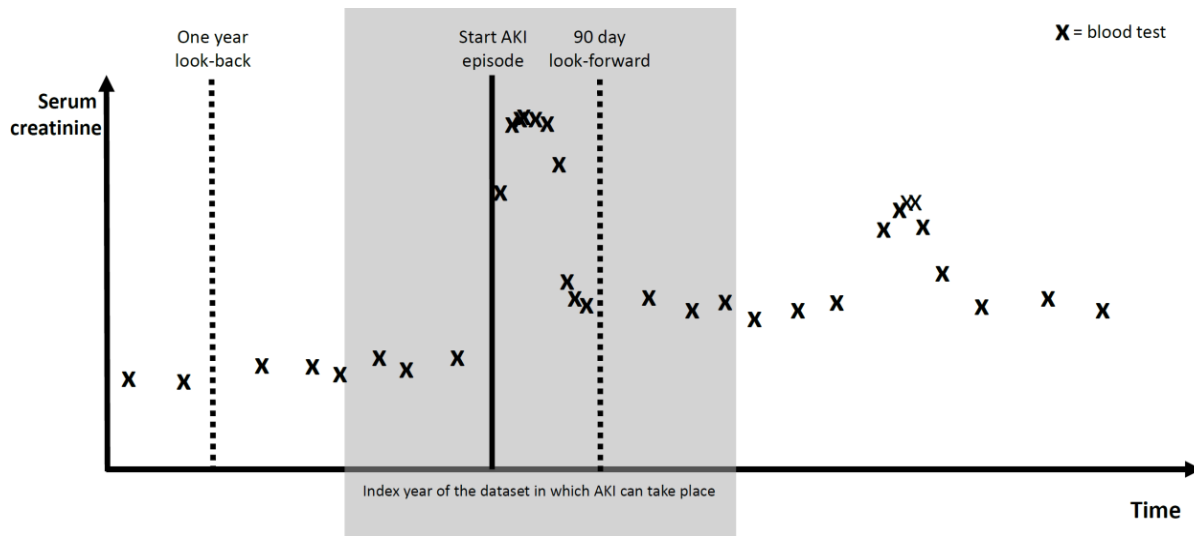

STROBE Statement—Checklist of items that should be included in reports of *cohort studies*

|                           | Item No | Recommendation                                                                                                                                                                                    | Pages            |
|---------------------------|---------|---------------------------------------------------------------------------------------------------------------------------------------------------------------------------------------------------|------------------|
| <b>Title and abstract</b> | 1       | (a) Indicate the study's design with a commonly used term in the title or the abstract                                                                                                            | 2                |
|                           |         | (b) Provide in the abstract an informative and balanced summary of what was done and what was found                                                                                               | 2                |
| <b>Introduction</b>       |         |                                                                                                                                                                                                   |                  |
| Background/rationale      | 2       | Explain the scientific background and rationale for the investigation being reported                                                                                                              | 4                |
| Objectives                | 3       | State specific objectives, including any prespecified hypotheses                                                                                                                                  | 5                |
| <b>Methods</b>            |         |                                                                                                                                                                                                   |                  |
| Study design              | 4       | Present key elements of study design early in the paper                                                                                                                                           | 5                |
| Setting                   | 5       | Describe the setting, locations, and relevant dates, including periods of recruitment, exposure, follow-up, and data collection                                                                   | 5                |
| Participants              | 6       | (a) Give the eligibility criteria, and the sources and methods of selection of participants. Describe methods of follow-up                                                                        | 5, 6             |
|                           |         | (b) For matched studies, give matching criteria and number of exposed and unexposed                                                                                                               | n/a              |
| Variables                 | 7       | Clearly define all outcomes, exposures, predictors, potential confounders, and effect modifiers. Give diagnostic criteria, if applicable                                                          | 7                |
| Data sources/measurement  | 8*      | For each variable of interest, give sources of data and details of methods of assessment (measurement). Describe comparability of assessment methods if there is more than one group              | 7, 8             |
| Bias                      | 9       | Describe any efforts to address potential sources of bias                                                                                                                                         | 8                |
| Study size                | 10      | Explain how the study size was arrived at                                                                                                                                                         | 5, 10, table 1   |
| Quantitative variables    | 11      | Explain how quantitative variables were handled in the analyses. If applicable, describe which groupings were chosen and why                                                                      | 9                |
| Statistical methods       | 12      | (a) Describe all statistical methods, including those used to control for confounding                                                                                                             | 9                |
|                           |         | (b) Describe any methods used to examine subgroups and interactions                                                                                                                               | 9                |
|                           |         | (c) Explain how missing data were addressed                                                                                                                                                       | n/a              |
|                           |         | (d) If applicable, explain how loss to follow-up was addressed                                                                                                                                    | n/a              |
|                           |         | (e) Describe any sensitivity analyses                                                                                                                                                             | 9                |
| <b>Results</b>            |         |                                                                                                                                                                                                   |                  |
| Participants              | 13*     | (a) Report numbers of individuals at each stage of study—eg numbers potentially eligible, examined for eligibility, confirmed eligible, included in the study, completing follow-up, and analysed | 10, tables 1 & 2 |
|                           |         | (b) Give reasons for non-participation at each stage                                                                                                                                              | 6                |
|                           |         | (c) Consider use of a flow diagram                                                                                                                                                                | n/a              |
| Descriptive data          | 14*     | (a) Give characteristics of study participants (eg demographic, clinical, social) and information on exposures and potential confounders                                                          | Tables 1 and 2   |
|                           |         | (b) Indicate number of participants with missing data for each variable of interest                                                                                                               | n/a              |
|                           |         | (c) Summarise follow-up time (eg, average and total amount)                                                                                                                                       | n/a              |
| Outcome data              | 15*     | Report numbers of outcome events or summary measures over time                                                                                                                                    | 10, 11, table 3  |

|    |                          |    |                                                                                                                                                                                                              |              |
|----|--------------------------|----|--------------------------------------------------------------------------------------------------------------------------------------------------------------------------------------------------------------|--------------|
| 1  | Main results             | 16 | (a) Give unadjusted estimates and, if applicable, confounder-adjusted estimates and their precision (eg, 95% confidence interval). Make clear which confounders were adjusted for and why they were included | 11, table 3  |
| 2  |                          |    | (b) Report category boundaries when continuous variables were categorized                                                                                                                                    | Table 3      |
| 3  |                          |    | (c) If relevant, consider translating estimates of relative risk into absolute risk for a meaningful time period                                                                                             | n/a          |
| 4  | Other analyses           | 17 | Report other analyses done—eg analyses of subgroups and interactions, and sensitivity analyses                                                                                                               | Tables 3 & 4 |
| 5  | <b>Discussion</b>        |    |                                                                                                                                                                                                              |              |
| 6  | Key results              | 18 | Summarise key results with reference to study objectives                                                                                                                                                     | 12           |
| 7  | Limitations              | 19 | Discuss limitations of the study, taking into account sources of potential bias or imprecision. Discuss both direction and magnitude of any potential bias                                                   | 13           |
| 8  | Interpretation           | 20 | Give a cautious overall interpretation of results considering objectives, limitations, multiplicity of analyses, results from similar studies, and other relevant evidence                                   | 14           |
| 9  | Generalisability         | 21 | Discuss the generalisability (external validity) of the study results                                                                                                                                        | 13           |
| 10 | <b>Other information</b> |    |                                                                                                                                                                                                              |              |
| 11 | Funding                  | 22 | Give the source of funding and the role of the funders for the present study and, if applicable, for the original study on which the present article is based                                                | 14           |

\*Give information separately for exposed and unexposed groups.

**Note:** An Explanation and Elaboration article discusses each checklist item and gives methodological background and published examples of transparent reporting. The STROBE checklist is best used in conjunction with this article (freely available on the Web sites of PLoS Medicine at <http://www.plosmedicine.org/>, Annals of Internal Medicine at <http://www.annals.org/>, and Epidemiology at <http://www.epidem.com/>). Information on the STROBE Initiative is available at <http://www.strobe-statement.org>.

# BMJ Open

## Acute kidney injury in the UK: A replication cohort study of the variation across three regional populations

|                                 |                                                                                                                                                                                                                                                                                                                                                                                                                                                                                                                                                                                                                                                                                                                                                                                                                                                                                                                                                                                                                                                                                                                                                                                                                                                                                                                                                                                                                                                                                                                                                                                                                                                                                                                                                                                                                                                                                                                                                                                                                                                                          |
|---------------------------------|--------------------------------------------------------------------------------------------------------------------------------------------------------------------------------------------------------------------------------------------------------------------------------------------------------------------------------------------------------------------------------------------------------------------------------------------------------------------------------------------------------------------------------------------------------------------------------------------------------------------------------------------------------------------------------------------------------------------------------------------------------------------------------------------------------------------------------------------------------------------------------------------------------------------------------------------------------------------------------------------------------------------------------------------------------------------------------------------------------------------------------------------------------------------------------------------------------------------------------------------------------------------------------------------------------------------------------------------------------------------------------------------------------------------------------------------------------------------------------------------------------------------------------------------------------------------------------------------------------------------------------------------------------------------------------------------------------------------------------------------------------------------------------------------------------------------------------------------------------------------------------------------------------------------------------------------------------------------------------------------------------------------------------------------------------------------------|
| Journal:                        | <i>BMJ Open</i>                                                                                                                                                                                                                                                                                                                                                                                                                                                                                                                                                                                                                                                                                                                                                                                                                                                                                                                                                                                                                                                                                                                                                                                                                                                                                                                                                                                                                                                                                                                                                                                                                                                                                                                                                                                                                                                                                                                                                                                                                                                          |
| Manuscript ID                   | bmjopen-2017-019435.R1                                                                                                                                                                                                                                                                                                                                                                                                                                                                                                                                                                                                                                                                                                                                                                                                                                                                                                                                                                                                                                                                                                                                                                                                                                                                                                                                                                                                                                                                                                                                                                                                                                                                                                                                                                                                                                                                                                                                                                                                                                                   |
| Article Type:                   | Research                                                                                                                                                                                                                                                                                                                                                                                                                                                                                                                                                                                                                                                                                                                                                                                                                                                                                                                                                                                                                                                                                                                                                                                                                                                                                                                                                                                                                                                                                                                                                                                                                                                                                                                                                                                                                                                                                                                                                                                                                                                                 |
| Date Submitted by the Author:   | 28-Feb-2018                                                                                                                                                                                                                                                                                                                                                                                                                                                                                                                                                                                                                                                                                                                                                                                                                                                                                                                                                                                                                                                                                                                                                                                                                                                                                                                                                                                                                                                                                                                                                                                                                                                                                                                                                                                                                                                                                                                                                                                                                                                              |
| Complete List of Authors:       | Sawhney, Simon; University of Aberdeen, Insitute of Applied Health Sciences<br>Robinson, Heather; University of Manchester, Centre for Health Informatics, Division of Informatics, Imaging and Data Sciences, Faculty of Biology, Medicine and Health, Manchester Academic Health Science Centre<br>van der Veer, Sabine N.; University of Manchester, Centre for Health Informatics, Division of Informatics, Imaging and Data Sciences, Faculty of Biology, Medicine and Health, Manchester Academic Health Science Centre<br>Hounkpatin, Hilda; University of Southampton, Academic Unit of Primary Care and Population Sciences, Faculty of Medicine<br>Scale, Timothy; Swansea University<br>Chess, James; Swansea University<br>Peek, N; University of Manchester, Centre for Health Informatics, Division of Informatics, Imaging and Data Sciences, Faculty of Biology, Medicine and Health, Manchester Academic Health Science Centre<br>Marks, Angharad; University of Aberdeen, Insitute of Applied Health Sciences<br>Davies, Gareth; Swansea University<br>Fraccaro, Paolo; University of Manchester, Centre for Health Informatics, Division of Informatics, Imaging and Data Sciences, Faculty of Biology, Medicine and Health, Manchester Academic Health Science Centre<br>Johnson, Matthew; University of Southampton, NIHR CLAHRC Wessex Data Science Hub, Faculty of Health Sciences<br>Lyons, Ronan; Swansea University<br>Nitsch, Dorothea; London School of Hygiene and Tropical Medicine<br>Roderick, Paul; University of Southampton, Academic Unit of Primary Care and Population Sciences, Faculty of Medicine<br>Halbesma, Nynke; University of Edinburgh, Usher Institute of Population Health Sciences and Informatics<br>Miller-Hodges, Eve; University of Edinburgh, British Heart Foundation Centre for Cardiovascular Science<br>Black, Corrinda; University of Aberdeen, Insitute of Applied Health Sciences<br>Fraser, Simon; University of Southampton, Academic Unit of Primary Care and Population Sciences, Faculty of Medicine |
| <b>Primary Subject Heading</b>: | Renal medicine                                                                                                                                                                                                                                                                                                                                                                                                                                                                                                                                                                                                                                                                                                                                                                                                                                                                                                                                                                                                                                                                                                                                                                                                                                                                                                                                                                                                                                                                                                                                                                                                                                                                                                                                                                                                                                                                                                                                                                                                                                                           |
| Secondary Subject Heading:      | Public health, Epidemiology                                                                                                                                                                                                                                                                                                                                                                                                                                                                                                                                                                                                                                                                                                                                                                                                                                                                                                                                                                                                                                                                                                                                                                                                                                                                                                                                                                                                                                                                                                                                                                                                                                                                                                                                                                                                                                                                                                                                                                                                                                              |
| Keywords:                       | EPIDEMIOLOGY, Nephrology < INTERNAL MEDICINE, Acute renal failure <                                                                                                                                                                                                                                                                                                                                                                                                                                                                                                                                                                                                                                                                                                                                                                                                                                                                                                                                                                                                                                                                                                                                                                                                                                                                                                                                                                                                                                                                                                                                                                                                                                                                                                                                                                                                                                                                                                                                                                                                      |

1  
2  
3  
4  
5  
6  
7  
8  
9  
10  
11  
12  
13  
14  
15  
16  
17  
18  
19  
20  
21  
22  
23  
24  
25  
26  
27  
28  
29  
30  
31  
32  
33  
34  
35  
36  
37  
38  
39  
40  
41  
42  
43  
44  
45  
46  
47  
48  
49  
50  
51  
52  
53  
54  
55  
56  
57  
58  
59  
60

|  |                           |
|--|---------------------------|
|  | NEPHROLOGY, PUBLIC HEALTH |
|  |                           |

SCHOLARONE™  
Manuscripts

For peer review only



1  
2  
3 Acute kidney injury in the UK: A replication cohort study of the variation across three regional  
4  
5 populations  
6  
7

8 **Short title:**

9  
10 **Variation in acute kidney injury in the UK**  
11  
12  
13

14 **Authors:**

15  
16 Dr Simon Sawhney MBChB<sup>1\*</sup>; Dr Heather A. Robinson PhD<sup>2\*</sup>; Dr Sabine N. van der Veer PhD<sup>2\*</sup>; Dr  
17  
18 Hilda O. Hounkpatin PhD<sup>3\*</sup>; Dr Timothy M. Scale MBChB<sup>4\*</sup>; Dr James A. Chess MBChB<sup>4\*</sup>; Prof Niels  
19  
20 Peek PhD<sup>2\*</sup>; Dr Angharad Marks MBChB<sup>1\*</sup>; Mr Gareth I. Davies MSc<sup>4\*</sup>; Dr Paolo Fraccaro PhD<sup>2\*</sup>; Mr  
21  
22 Matthew J. Johnson BA<sup>3\*</sup>; Prof Ronan A. Lyons MD<sup>4\*</sup>; Prof Dorothea Nitsch MD<sup>5\*</sup>; Prof Paul J.  
23  
24 Roderick MD<sup>6\*</sup>; Dr Nynke Halbesma PhD<sup>7\*</sup>; Dr Eve Miller-Hodges MBChB<sup>8\*</sup>; Prof Corri Black MBChB<sup>1\*</sup>  
25  
26 and Dr Simon D.S. Fraser DM<sup>6\*</sup>  
27  
28

- 29 1. Institute of Applied Health Sciences, University of Aberdeen, Aberdeen, UK
- 30  
31 2. Centre for Health Informatics, Division of Informatics, Imaging and Data Sciences, Faculty of Biology,  
32  
33 Medicine and Health, Manchester Academic Health Science Centre, The University of Manchester,  
34  
35 Manchester, UK.
- 36  
37 3. NIHR CLAHRC Wessex Data Science Hub, Faculty of Health Sciences, University of Southampton,  
38  
39 Southampton, UK
- 40  
41 4. University of Swansea, Swansea, UK
- 42  
43 5. London School of Hygiene and Tropical Medicine, London, UK
- 44  
45 6. Academic Unit of Primary Care and Population Sciences, Faculty of Medicine, University of  
46  
47 Southampton, Southampton, UK
- 48  
49 7. Usher Institute of Population Health Sciences and Informatics, University of Edinburgh, Edinburgh, UK
- 50  
51 8. British Heart Foundation Centre for Cardiovascular Science, University of Edinburgh, Edinburgh, UK
- 52  
53 \* The Farr Institute of Health Informatics Research
- 54  
55

56 **Correspondence to:**  
57  
58

1  
2  
3  
4  
5  
6  
7  
8  
9  
10  
11  
12  
13  
14  
15  
16  
17  
18  
19  
20  
21  
22  
23  
24  
25  
26  
27  
28  
29  
30  
31  
32  
33  
34  
35  
36  
37  
38  
39  
40  
41  
42  
43  
44  
45  
46  
47  
48  
49  
50  
51  
52  
53  
54  
55  
56  
57  
58  
59  
60

Simon Sawhney; Institute of Applied Health Sciences; Room 1:040 Polwarth building; Foresterhill;  
Aberdeen; AB25 2ZD; [simon.sawhney@abdn.ac.uk](mailto:simon.sawhney@abdn.ac.uk); +44 (0)1224 437130

For peer review only

## Abstract

### Objectives

A rapid growth in the reported rates of acute kidney injury (AKI) has led to calls for greater attention and resources for improving care. However, the reported incidence of acute kidney injury (AKI) also varies more than tenfold between previous studies. Some of this variation is likely to stem from methodological heterogeneity. This study explores the extent of cross-population variation in AKI incidence after minimising heterogeneity.

### Design

Population-based cohort study analysing data from electronic health records from three regions in the UK through shared analysis code and harmonised methodology.

### Setting

Three populations from Scotland, Wales and England covering three time periods: Grampian 2003, 2007, 2012; Swansea 2007; and Salford 2012.

### Participants

All residents in each region, aged 15 years or older.

### Main outcome measures

Population incidence of AKI, and AKI phenotype (severity, recovery, recurrence). Determined using shared biochemistry-based AKI episode code and standardised by age and sex.

### Results

Respectively, crude AKI rates (per 10,000/year) were: 131, 138, 139, 151 and 124 (p value = 0.095); and after standardisation for age and sex: 147, 151, 146, 146 and 142 (p value = 0.257) for Grampian

1  
2  
3 2003, 2007, 2012; Swansea 2007; and Salford 2012. The pattern of variation in crude rates was  
4  
5 robust to any modifications of the AKI definition. Across all populations and time periods AKI rates  
6  
7 increased substantially with age from ~20 to ~550 per 10,000/year among those aged <40 and ≥70  
8  
9 years.

### 10 11 12 13 **Conclusion**

14  
15 When harmonised methods are used and age and sex differences are accounted for, a similar high  
16  
17 burden of AKI is consistently observed across different populations and time periods (~150 per  
18  
19 10,000/year). There are particularly high rates of AKI among older people. Policy-makers should be  
20  
21 careful not draw simplistic assumptions about variation in AKI rates based on comparisons that are  
22  
23 not rigorous in methodological terms.  
24  
25

### 26 27 28 29 **Strengths and limitations**

- 30  
31 - Previous studies have reported substantial variation in the incidence of AKI between regions  
32  
33 and over time, but have involved heterogeneous methods that limit comparability. To our  
34  
35 best knowledge, this is the first cross-population study of AKI incidence within one study,  
36  
37 with minimised methodological heterogeneity by sharing analysis code across regions.  
38  
39 - By using consistent methods, and real-life, routinely collected health care data, we provide  
40  
41 new evidence that the rates of AKI in the UK are similar across different regions and time  
42  
43 periods: ~150 events per 10,000/year (1.5% of the population).  
44  
45  
46 - These findings may not be generalisable outside of the regions of the UK in the study.  
47  
48 However to enable researchers to replicate this work, we have made publically available our  
49  
50 analysis code for identifying and characterising AKI episodes.  
51  
52  
53  
54  
55  
56  
57  
58  
59  
60

## Introduction

The reported outcomes following acute kidney injury (AKI) are consistently poor<sup>[1]</sup>. Reports of a growth in rates of AKI have led to calls for greater attention and resources for improving care<sup>[2]</sup>, but there is a more than tenfold variation between studies in the reported population incidence of AKI<sup>[3-7]</sup>. Population based estimates of AKI incidence range from 18 per 10,000/year<sup>[3]</sup> to 250 per 10,000/year<sup>[5]</sup> based on changes in serum creatinine over time, and from 3 to 40 per 10,000/year based on hospital episode codes for “non-dialysis requiring AKI”<sup>[8,9]</sup>. This wide variation is difficult to fully explain<sup>[10]</sup>, but is likely to be due in part to a changing clinical landscape with evolving international AKI criteria<sup>[11-14]</sup>, and different pragmatic interpretations of AKI criteria in research<sup>[5,15]</sup>. These reasons for variation are all potential sources of bias in clinical studies of AKI (figure 1). Without a clearer understanding of why populations differ, it is challenging (and potentially misleading) to interpret clinical research in context, to make comparisons across populations or over time, or to make informed public health recommendations.

Worldwide, health services are undertaking quality initiatives to increase clinical awareness and improve treatment of AKI<sup>[16-19]</sup> in order to achieve the International Society of Nephrology (ISN) target of eliminating avoidable deaths from AKI by 2025<sup>[20]</sup>. To evaluate the effectiveness of these initiatives, it is vital that there is a harmonisation of approaches to clinical research. This means minimising methodological heterogeneity so that the findings of future research are more comparable, and maximising transparency so that trends in disease incidence and outcomes can be understood. Methodological heterogeneity can arise when researchers extract data from different data infrastructures, make different assumptions, and adopt different criteria for identifying events. These steps are particularly important in AKI, because of the recognised challenges of AKI research: it occurs unpredictably, in different clinical locations<sup>[21]</sup>, may be transient<sup>[22]</sup>, and relies on trends rather than absolute values<sup>[12-14]</sup>. Small differences in how these challenges are handled can alter both the reported incidence and prognosis of AKI<sup>[5,15,21,23]</sup>. Despite its importance, this information is

1  
2  
3 often undocumented or described in insufficient detail for research to be reproduced<sup>[24]</sup>. We have  
4  
5 described these reasons for variation in AKI rates in a conceptual model (figure 1).  
6  
7

8  
9 Algorithms using blood test data from electronic health records (EHR), offer the potential of an  
10  
11 objective common language for observing common diseases in clinical practice, audit and  
12  
13 research<sup>[25]</sup>. In previous work, we developed an extended version of a widely used NHS algorithm for  
14  
15 detecting AKI in blood tests<sup>[26]</sup> which not only flags individual “AKI” blood tests, but also applies  
16  
17 phenotyping methods to combine AKI flagged blood tests into clinically meaningful AKI illness  
18  
19 episodes grouped by severity, duration, recovery and recurrence<sup>[27,28]</sup>. Sharing this algorithm  
20  
21 between researchers working with different populations provides an opportunity to develop a  
22  
23 harmonised approach to clinical research, robustly comparing the burden of AKI across different  
24  
25 populations and over time, even when patient-level data cannot be shared. We used this to study of  
26  
27 variation in the incidence of AKI across three populations from England, Scotland and Wales. The  
28  
29 analysis spans a decade of change in the clinical awareness of AKI<sup>[16]</sup>, change in international AKI  
30  
31 criteria<sup>[12-14]</sup> and change in the emphasis on community surveillance of people with chronic  
32  
33 diseases<sup>[29-31]</sup>. Our aim was to explore the extent of cross-population variation in AKI incidence using  
34  
35 real-life data, while minimising heterogeneity through harmonised methods.  
36  
37  
38  
39  
40

## 41 **Materials and Methods**

### 42 *Population profiles*

43  
44 This study compares datasets created using linked EHR data from primary and secondary care for  
45  
46 three UK regions with different “index” years from 2003-2014: Grampian 2003, 2007 and 2012;  
47  
48 Abertawe Bro Morgannwg University Health Board (ABMU, referred to in this article as Swansea)  
49  
50 2007; and Salford 2012 (supplemental figure 1). Each dataset involves health data from the UK NHS  
51  
52 and includes complete primary and secondary care biochemistry capture for the region. A fourth  
53  
54  
55  
56  
57  
58  
59  
60

1  
2  
3 region initially considered for this analysis (from South England) was excluded because initial  
4  
5 inspection of the data characteristics revealed that the population capture of the data source was  
6  
7 incomplete and might have led to bias in the estimation of AKI. All regions provide public healthcare,  
8  
9 free at the point of use.

10  
11  
12  
13 NHS Grampian, a health authority in Scotland, is served primarily by one large tertiary hospital and  
14  
15 another district general hospital. All biochemistry for the dataset was extracted from a single  
16  
17 biochemistry department covering the entire regional population<sup>[5]</sup>. The Grampian dataset was  
18  
19 linked with the Scottish Renal Registry to exclude those already receiving chronic renal replacement  
20  
21 therapy (RRT), to avoid misclassification of RRT as AKI. Similarly, Salford (North England) represents  
22  
23 one borough of Greater Manchester, served by a single NHS hospital and biochemistry laboratory<sup>[32]</sup>.  
24  
25 Read codes (version 2) were used to extract biochemistry information and exclude records from  
26  
27 people receiving chronic RRT. In contrast, ABMU (Swansea, Wales) in 2007 covered a region served  
28  
29 by four district general hospitals and four laboratories using two information management  
30  
31 systems<sup>[33,34]</sup>. Those receiving chronic RRT could not be directly determined from a register but could  
32  
33 be excluded based on the hospital location marked on the blood tests.  
34  
35  
36  
37

38  
39 To provide further contextual description of these populations we collected information on  
40  
41 population mortality and relevant morbidities (renal and vascular) from the Office of National  
42  
43 Statistics, UK Renal Registry, and Quality Outcomes Framework (QOF) data entered by GP practices  
44  
45 (table 1). Importantly, QOF data represent incentivised recording by GPs of people with a given  
46  
47 condition (e.g. chronic kidney disease), rather than actual population prevalences. This means that  
48  
49 small differences in prevalence on the disease registers may represent recording practice as well as  
50  
51 actual disease prevalence, and should be interpreted with caution.  
52  
53  
54  
55  
56  
57  
58  
59  
60

### *Conceptual framework*

In figure 1, we provide a conceptual framework for understanding the sources of variation in AKI revealed by our analysis. We sought to minimise “artefactual” methodological differences in AKI episode rates by utilising only datasets where complete data capture (from both hospital and community settings) was possible; by harmonising data preparation and cleaning; and by standardising code sets for identifying AKI episodes. We also accounted for “real” potential sources of variation in AKI rates by performing age and sex standardisation, stratification by baseline eGFR for case-mix differences, and comparing the number of people with blood tests in rapid succession as a surrogate for presence of an acute illness.

### *Data extraction and processing*

This study used a distributed analysis approach to protect the confidentiality of patient-level data. Data were analysed by on-site researchers working from the same code. Non-disclosive summary statistics were aggregated into a single dataset, which was analysed centrally. This ensured that patient-level data were never brought together in a single physical location. All serum creatinine results for each individual were extracted. Creatinine values that were missing, were a non-value (e.g. “sample inadequate”, “sample error”), or were lower than the limit for detection of the analyser were excluded. The “Modification of Diet in Renal Disease” (MDRD) study estimated glomerular filtration rate (eGFR) was calculated using the abbreviated 4 variable equation<sup>[35]</sup>. Finally, to avoid a non-chronological evaluation of samples from different locations, where multiple samples were available for the same individual on a given day, the sample with the highest creatinine value was retained for analysis.

### *AKI identification and phenotyping*

A challenge of AKI clinical research is the operationalisation of precise international AKI criteria in “real-life” data where people do not receive blood tests in a protocolised fashion. Blood tests may



1  
2  
3 not have been done at the necessary times to directly observe an acute rise in creatinine from a  
4 previous baseline, and assumptions based on available data are required. We identified differences  
5 in assumptions for determining AKI as an important potential methodological reason for observed  
6 variation in AKI rates (figure 1) and therefore used the exact same definition and analysis code in  
7 each region. Kidney Disease Improving Global Outcomes (KDIGO)-based AKI detection and  
8 phenotyping algorithm code was applied by separate analysts working locally on each dataset<sup>[14]</sup>. As  
9 summarised in supplemental table 1, these criteria compare each blood test with previous  
10 “baseline” results within the last 365 days (“the look-back period”) to determine if a recent change  
11 has occurred<sup>[27]</sup>. Where AKI occurred, a “look-forward period” of 90 days was used to follow and  
12 phenotype the whole AKI episode. In supplemental figure 2, these look-back and look-forward time  
13 periods are illustrated for a single hypothetical patient with respect to a moment of developing AKI  
14 within the index year. For those without AKI, the first eGFR of the index year was used as the  
15 baseline eGFR. For convenience we used a baseline eGFR <60 ml/min/1.72m<sup>2</sup> as an indicator of  
16 chronic kidney disease. Shared Stata code provided the following outputs: number of blood tests  
17 consistent with AKI, number of AKI episodes, baseline eGFR, AKI episode severity stage, progression  
18 of AKI severity from a lower to higher stage, recovery to baseline within 90 days, and presence of  
19 prior AKI episodes in the past three years (i.e. making the episode a recurrent AKI episode).

20  
21  
22  
23  
24  
25  
26  
27  
28  
29  
30  
31  
32  
33  
34  
35  
36  
37  
38  
39  
40  
41 We also analysed data using more parsimonious versions of the KDIGO criteria: a “narrow  
42 interpretation” in which blood tests were only compared if they were no more than a week apart  
43 (i.e. restricted to criteria 2 and 3), and a “very narrow interpretation” comparing only tests no more  
44 than two days apart (i.e. restricted to criterion 3). If variation was due to a lack of robustness of AKI  
45 criteria in the face of estimating baseline from less recent data, these narrower interpretations  
46 would be expected to lead to less variation in AKI incidence.

1  
2  
3 To ensure uniformity of the application and interpretation of AKI code, a mock dataset of 40  
4 hypothetical patients was developed. This mock dataset deliberately contained unformatted  
5 variables and a variety of creatinine trend patterns to represent a full range of data cleaning steps,  
6  
7 AKI phenotypes, blood test intervals and interpretation issues. Each analyst used the same code on  
8  
9 the test dataset and reproduced the same results before progressing to analysing regional data. We  
10  
11 have made the algorithm code, mock dataset, and instructions for their optimal use in Stata freely  
12  
13 available from <https://github.com/RenalHDRUK>.  
14  
15  
16  
17  
18  
19

### 20 *Statistical analysis*

21  
22 Analyses included the description of baseline characteristics, comparison of both crude and age-sex  
23 standardised rates of AKI, and phenotypes of AKI episodes. We also compared AKI rates in  
24 subgroups of baseline eGFR (as described above) and individual components of AKI criteria to  
25  
26 determine if variations in rate were robust to changes in the AKI definition (table 2). AKI can only be  
27  
28 identified when sufficient blood tests have been performed to detect a change. Therefore, to  
29  
30 evaluate reasons for residual variation, we described the patterns of blood testing in each region,  
31  
32 including the frequency of blood tests, the regularity (e.g. blood tests no more than 2 and 7 days  
33  
34 apart) and blood test location (hospital and outpatient/community).  
35  
36  
37  
38  
39  
40

41 Baseline characteristics included age, sex, the number of people with evidence of renal impairment  
42 (eGFR < 60 ml/min/1.73m<sup>2</sup>) on their first test in the index year, the number of people with blood  
43 tests sufficiently close together for it to be possible to detect an “AKI” result if present (two tests no  
44  
45 more than 365 days apart).  
46  
47  
48  
49  
50

51 We compared population rates of AKI episodes across each region and index year. We compared AKI  
52  
53 episode rates using national statistics mid-year population estimates for each region, and then  
54  
55 standardised to the England population for 2012<sup>[36]</sup>, a reference population selected as two of the  
56  
57  
58  
59  
60

1  
2  
3 three regions provided 2012 data. All AKI episodes in the index year counted towards the overall AKI  
4 episode rate. One way ANOVA followed by Tukey's post-hoc test (in the event of significant  
5 differences) was used to identify pairwise significant differences in population level AKI episode  
6 rates.  
7  
8  
9

10  
11  
12  
13 For people with sufficient blood tests to potentially detect an episode of AKI (at least two tests no  
14 more than 365 days apart), we compared rates within eGFR strata (<30, 30-44, 45-59 and  $\geq 60$   
15 ml/min/1.73m<sup>2</sup>). The proportion of the population with at least one AKI result based on AKI criteria  
16 1, 2, or 3 (table 2), and the proportion of the population with at least one AKI result based on  
17 narrower interpretations of KDIGO criteria (restricting to criteria 2 & 3, or criterion 3 alone) were  
18 also recorded. To evaluate the impact of incomplete biochemistry capture, we also recalculated AKI  
19 rates using only tests taken from people in hospital. Of note a distinction between hospital inpatient  
20 and outpatient results was not possible in Salford.  
21  
22  
23  
24  
25  
26  
27  
28  
29  
30  
31

32 To evaluate potential sources of residual variation in AKI rates after harmonised analysis we  
33 compared patterns of blood testing (number, frequency and location).  
34  
35  
36  
37

### 38 *Patient involvement*

39  
40 No patients were involved in development of the research question or the design of the study. There  
41 are no plans to disseminate the results of the research to study participants.  
42  
43  
44  
45  
46  
47

## 48 **Results**

### 49 *Populations and baseline characteristics*

50  
51 As described in table 1, populations ranged in size from 193,882 (Salford 2012) to 482,444 people  
52 (Grampian 2012) (table 3). Crude reported population mortality rates were higher in Swansea than  
53  
54  
55  
56  
57

1  
2  
3 Grampian and Salford, as was the incidence of people starting long term RRT. The recognition of  
4 diabetes and cardiovascular diseases in incentivised GP registers was similar across the populations.  
5  
6  
7

8  
9 Table 2 shows the baseline characteristics of extracted datasets after harmonised data cleaning. The  
10 percentage of people with at least two tests no more than 365 days apart varied from 17 – 25% with  
11 the fewest in the earliest dataset (Grampian 2003). There was a greater proportion of people tested  
12 with renal impairment (estimated glomerular filtration rate, eGFR <60 ml/min/1.73m<sup>2</sup>) in 2007  
13 compared to the other years of study.  
14  
15  
16  
17  
18  
19  
20  
21

### 22 *Incidence of AKI episodes*

23  
24 Table 3 and figure 2 show the differences in crude and standardised rates of AKI episodes for each  
25 dataset. A minority of people had more than one AKI episode in the index year. For reporting AKI  
26 episode rates (table 3) all episodes are included, whereas for reporting phenotypes of people with  
27 an AKI episode, the first episode is described (bottom of table 3 and table 4). Crude AKI rates varied  
28 with the lowest in Salford 2012 and highest rate in Swansea 2007 (124-151 per 10,000/year, p value  
29 = 0.095). Standardisation by age and sex accounted for residual differences (142-151 per  
30 10,000/year, p value = 0.257), with 95% confidence intervals overlapping in all instances. Age and  
31 sex standardised AKI rates varied little between Grampian 2003, 2007 and 2012 (146-151 per  
32 10,000/year). Table 3 also shows that the majority of people developing AKI could be identified using  
33 hospital tests alone, and just over half could be identified in each region using a rigid interpretation  
34 of KDIGO AKI criteria. Finally, across all populations, the proportion of people developing AKI in the  
35 index year increased substantially with increasing age and lower eGFR.  
36  
37  
38  
39  
40  
41  
42  
43  
44  
45  
46  
47  
48  
49  
50

51 As shown in figure 3, the pattern of variation in crude AKI rates was the same when narrower  
52 interpretations of KDIGO AKI criteria were used, comparing only blood tests in the prior 2 and 7  
53  
54  
55  
56  
57

1  
2  
3 days. Table 4 shows this pattern was also similar when analysis was limited to each individual  
4  
5 component of the AKI criteria, or within strata of baseline eGFR.  
6  
7

### 8 9 *AKI phenotypes*

10  
11 Table 4 describes the first AKI episode for people with an AKI episode during the index year. As well  
12  
13 as having the highest crude AKI rate, a greater proportion of those with AKI in Swansea were older,  
14  
15 had baseline eGFR <60 ml/min/1.73m<sup>2</sup> (37.6%), had a severe AKI episode (15.4% stage 3) had non-  
16  
17 recovery at 90 days (45.1%). In Grampian between 2003 and 2012 there was a steady improvement  
18  
19 in the proportion of people with renal recovery 90 days after AKI from 42% to 49%.  
20  
21

### 22 23 24 *Further sources of variation*

25  
26 In addition to assessing for age, sex and case-mix differences, we evaluated the blood testing  
27  
28 patterns and clinical location contexts of each dataset (figure 4). Figure 4A shows the frequency of  
29  
30 blood tests taken grouped by location: hospital inpatient or outpatient/community. Figure 4B shows  
31  
32 the proportion of people with blood tests in close succession. In Grampian from 2003 to 2012,  
33  
34 community blood testing increased over time but the frequency of hospital inpatient testing  
35  
36 remained unchanged. Test location was not available in Salford, but the proportions of people with  
37  
38 two blood tests no more than 2 and 7 days apart was lower than in Grampian and Swansea. Figure 1  
39  
40 shows the conceptual framework for understanding these sources of variation.  
41  
42  
43  
44  
45

## 46 **Discussion**

47  
48 To our knowledge, this is the first multicentre study to systematically evaluate the extent of and  
49  
50 reasons for regional and temporal variation in population rates of AKI, using a harmonised  
51  
52 methodological approach. There were differences in the crude rates of AKI between datasets, but  
53  
54 after accounting for age and sex, standardised rates were strikingly similar (at 140-150 episodes per  
55  
56  
57  
58  
59

1  
2  
3 10,000/year, or ~1.5% of the population). The consistently high proportion of people aged over 70  
4  
5 developing AKI was also striking (>5%), and has implications for the planning the future health care  
6  
7 requirements of an aging population. This analysis shows the importance of both harmonised  
8  
9 methods and standardisation for case-mix prior to any between centre comparisons for description  
10  
11 of variation in AKI.  
12  
13  
14

15 Our analysis provides additional insight into previous reports of a rising AKI incidence in studies  
16  
17 based on hospital episode codes or differing AKI definitions<sup>[10]</sup>. Applying the same KDIGO-based AKI  
18  
19 definition to data from the same region, over a ten-year span (2003-2012), the standardised AKI  
20  
21 rates in Grampian changed little. Notably, this stability was in spite of an increasing frequency of  
22  
23 outpatient/community testing in Grampian (whereas the frequency of hospital inpatient testing  
24  
25 changed little over the same period). In addition, our analysis showed similar (albeit reduced) AKI  
26  
27 rates across the regions when only hospital blood samples were analysed, or when the AKI definition  
28  
29 was limited on only blood tests within the past week. Our analysis also showed a pattern of AKI  
30  
31 phenotypes that was consistent with case-mix differences between regions. Swansea, which had the  
32  
33 highest all-cause population mortality, also had the highest proportion of AKI phenotypes for  
34  
35 severity, AKI progression, and non-recovery.  
36  
37  
38  
39

40  
41 Between population variation in the prevalence of kidney disease has previously been described for  
42  
43 CKD in Ireland<sup>[37]</sup>, Germany<sup>[38]</sup> and Taiwan<sup>[39]</sup>, as have variation *between* European countries<sup>[40]</sup>. In  
44  
45 our analysis, we have now shown that much of the regional variation in AKI between UK regions can  
46  
47 be eliminated by harmonising methods, definitions and correcting for age and sex differences. The  
48  
49 stability we report in the AKI incidence over multiple time points in a ten year period is contrary to  
50  
51 previous studies from the UK and North America<sup>[10]</sup>. Given the precautions that we took to minimise  
52  
53 heterogeneity, it is possible that some differences reported in previous studies represent a  
54  
55 methodological artefact (e.g. data capture or case-mix). Consistent with our findings, a recent study  
56  
57  
58  
59

1  
2  
3 of hospital based AKI among people admitted to the Mayo Clinic also found no significant change in  
4 AKI rates between 2006-2014 using a consistent creatinine change AKI definition across each year  
5 and stratifying by age and sex<sup>[41]</sup>. Furthermore, in our analysis the pattern of differences in crude AKI  
6 rates was robust to modifications of KDIGO criteria using shorter look-back periods.  
7  
8  
9

10  
11  
12  
13 Our study has caveats common to observational studies, which we have highlighted in a conceptual  
14 model that explains the reasons for observed variation in AKI rates (figure 1). In particular, even  
15 though we utilised data from three regions with the same social healthcare system (the UK National  
16 Health Service), we encountered incomplete population data capture that led to the exclusion of a  
17 fourth region from the study. As we note in figure 1, differences in population capture arising out of  
18 incomplete data extraction are not necessarily visible to researchers analysing anonymised large  
19 datasets. This serves as a critical caution for researchers and policy-makers to avoid making  
20 simplistic assumptions that data from different regions are necessarily comparable when they are  
21 derived from different sources. We note that while we have used data from GP registers to provide  
22 contextual information on the populations, these data need to be interpreted carefully as they also  
23 reflect recording practices in primary care rather than solely disease burden. We would also like to  
24 remind readers that while we have applied AKI criteria consistently with the same code in each  
25 region, where sparse data exist there still may have been bidirectional misclassification between AKI  
26 and CKD. Similarly, where AKI has occurred in the context of critical illness, falsely low creatinine  
27 values from loss of muscle mass may imply a renal recovery that has not occurred. This is a challenge  
28 for all observational studies using routine blood test data. Nevertheless a strength of our analysis is  
29 that we have used the same pragmatic approach to this challenge across each of the populations  
30 and time periods in the study. Finally, we note that only data from three UK regions were available  
31 for inclusion in our study. This is insufficient to describe variation for the whole of the UK and other  
32 countries. This article represents a first step towards more harmonised comparisons of AKI across  
33  
34  
35  
36  
37  
38  
39  
40  
41  
42  
43  
44  
45  
46  
47  
48  
49  
50  
51  
52  
53  
54  
55  
56  
57  
58  
59  
60

1  
2  
3 populations. We have shared our code with this article (<https://github.com/RenalHDRUK>) and now  
4  
5 invite researchers working with population datasets in other regions to add to our experience.  
6  
7

8  
9 In conclusion, our analysis shows the need for a robust methodological approach and recognition of  
10  
11 case-mix differences when evaluating between-centre and temporal trends in AKI. The sharing of  
12  
13 code is key to this approach and we have made our code from this article available for researchers  
14  
15 to use. Using this approach we show strikingly similar rates of AKI across different populations from  
16  
17 England, Scotland and Wales over a ten year period. A consistently high burden of AKI is apparent  
18  
19 with an estimated 1.5% of the UK population experiencing AKI each year, rising to more than 5% per  
20  
21 year in the elderly. Current quality initiatives should adopt these methods or similar methods when  
22  
23 evaluating the impact of changes in practice on the burden of AKI.  
24  
25  
26  
27  
28

### 29 **Contributors**

30  
31 CB, SF, SS and SV conceived the study. AM, GD, HR, HH, MJ, SS and TS contributed to collection of  
32  
33 the data. AM, CB, HH, HR, JC, NP, PF, PR, SS, SV, TS and SF contributed to analysis of the data. AM,  
34  
35 CB, DN, EMH, GD, HH, HR, JC, MJ, NH, NP, PF, PR, RL, SS, SV, TS and SF contributed to interpretation  
36  
37 of the data. SS and SF drafted the manuscript with input from AM, CB, DN, EMH, GD, HH, HR, JC, MJ,  
38  
39 NH, NP, PF, PR, RL, SV and TS. All authors approved the final version.  
40  
41  
42  
43  
44

### 45 **Acknowledgements**

46  
47 We would like to acknowledge all the data providers who make anonymised data available for  
48  
49 research. This study makes use of anonymised data held in the Secure Anonymised Information  
50  
51 Linkage (SAIL) system, which is part of the national e-health records research infrastructure for  
52  
53 Wales. We thank the Salford Integrated Record (SIR) board for providing us with the 2014 release of  
54  
55 the SIR used in this study.  
56  
57  
58  
59  
60



## Funding

This work was funded by a grant from the UK's Farr Institute for Health Informatics Research (UKHIRN/XFarrRP001). The Farr Institute is supported by a 10-funder consortium: Arthritis Research UK, the British Heart Foundation, Cancer Research UK, the Economic and Social Research Council, the Engineering and Physical Sciences Research Council, the Medical Research Council, the National Institute of Health Research, the National Institute for Social Care and Health Research (Welsh Assembly Government), the Chief Scientist Office (Scottish Government Health Directorates), and the Wellcome (MRC Grant Nos: CIPHER MR/K006525/1, HeRC MR/K006665/1, London MR/K006584/1, Scotland MR/K007017/1). We also acknowledge the data management support of Grampian Data Safe Haven (DaSH) and the associated financial support of NHS Research Scotland, through NHS Grampian investment in the Grampian DaSH. Work on this project was also part funded by the National Institute for Health Research (NIHR) Collaboration for Leadership in Applied Health Research and Care (CLAHRC) Wessex and Health Care and Research Wales. SS is supported by a research training fellowship from the Wellcome Trust to study the outcomes of acute kidney injury (WT102729/Z/13/Z). The funders of this study had no role in study design; collection, analysis, and interpretation of data; writing the report; or the decision to submit the report for publication.

## Competing Interests

All authors have completed the ICMJE uniform disclosure form at [www.icmje.org/coi\\_disclosure.pdf](http://www.icmje.org/coi_disclosure.pdf) and declare: DN reports grants from Informatica, for analyses of the National CKD Audit which was tendered by HQIP (funding from NHS Wales and NHS England), outside the submitted work. SS is supported by a research training fellowship from the Wellcome Trust to study the outcomes of acute kidney injury (WT102729/Z/13/Z). No other support from any organisation for the submitted work; no other financial relationships with any organisations that might have an interest in the submitted

1  
2  
3 work in the previous three years; no other relationships or activities that could appear to have  
4  
5 influenced the submitted work.  
6  
7  
8  
9

### 10 **Ethical Approval**

11  
12 Permission for the use of Grampian biochemistry data using routine biochemistry to identify AKI was  
13  
14 provided by University of Aberdeen Sponsor, NHS Grampian Caldicott, respective data custodians,  
15  
16 NHS Privacy Advisory Committee (ref PAC 33/14), NHS Research and Development Office (project  
17  
18 no. 2014RM003) and National Research Ethics Service (reference 14/NW/1371). Permission to  
19  
20 analyse SIR data was granted to North West eHealth via the SIR approval board in 2012, which  
21  
22 incorporates the appropriate information governance. Further ethical approval was not required,  
23  
24 due to the anonymised nature of the data. We thank the SIR board for providing us with the 2014  
25  
26 release of the SIR used in this study. Permissions for using the SAIL databank were gained through  
27  
28 application for the SAIL 0505 project, looking at acute kidney injury in Wales. This was reviewed by  
29  
30 the Information governance review panel (IGRP) which contains members of the British Medical  
31  
32 Association (BMA), National Research Ethics Service (NRES), public health Wales, NHS Wales  
33  
34 informatics service (NWIS) and consumer panel.  
35  
36  
37  
38  
39  
40

### 41 **Data Sharing**

42 No additional data available. Analysis code is freely available from <https://github.com/RenalHDRUK>.  
43  
44  
45  
46  
47

### 48 **Transparency declaration**

49  
50 The lead author (SS) affirms that the manuscript is an honest, accurate, and transparent account of  
51  
52 the study being reported; that no important aspects of the study have been omitted; and that any  
53  
54 discrepancies from the study as planned have been explained.  
55  
56  
57  
58  
59  
60

## References

- [1] Chertow GM, Burdick E, Honour M, Bonventre JV, Bates DW. Acute Kidney Injury, Mortality, Length of Stay, and Costs in Hospitalized Patients. *Journal of the American Society of Nephrology* 2005;16(11):3365-3370.
- [2] Hsu RK, Siew ED. The growth of AKI: half empty or half full, it's the size of the glass that matters. *Kidney international* 2017;92(3):550-553.
- [3] Ali T, Khan I, Simpson W, Prescott G, Townend J, Smith W, et al. Incidence and Outcomes in Acute Kidney Injury: A Comprehensive Population-Based Study. *Journal of the American Society of Nephrology* 2007;18(4):1292-1298.
- [4] Hsu C, McCulloch C, Fan D, Ordonez J, Chertow G, Go A. Community-based incidence of acute renal failure. *Kidney international* 2007;72(2):208-212.
- [5] Sawhney S, Fluck N, Marks A, Prescott G, Simpson W, Tomlinson L, et al. Acute kidney injury—how does automated detection perform? *Nephrology Dialysis Transplantation* 2015;30(11):1853-1861.
- [6] Waikar SS, Curhan GC, Wald R, McCarthy EP, Chertow GM. Declining mortality in patients with acute renal failure, 1988 to 2002. *Journal of the American Society of Nephrology* 2006;17(4):1143-1150.
- [7] Bedford M, Stevens P, Wheeler T, Farmer C. What is the real impact of acute kidney injury? *BMC Nephrology* 2014;15(1):95.
- [8] Kolhe NV, Muirhead AW, Wilkes SR, Fluck RJ, Taal MW. The epidemiology of hospitalised acute kidney injury not requiring dialysis in England from 1998 to 2013: retrospective analysis of hospital episode statistics. *International journal of clinical practice* 2016;70(4):330-339.
- [9] Hayward JS, McArthur E, Nash DM, Sontrop JM, Russell SJ, Khan S, et al. Kidney Disease Among Registered Métis Citizens of Ontario: A Population-Based Cohort Study. *Canadian Journal of Kidney Health and Disease* 2017;4:2054358117703071.
- [10] Siew ED, Davenport A. The growth of acute kidney injury: a rising tide or just closer attention to detail? *Kidney international* 2015;87(1):46-61.
- [11] Van Biesen W, Vanholder R, Lameire N. Defining Acute Renal Failure: RIFLE and Beyond. *Clinical Journal of the American Society of Nephrology* 2006;1(6):1314-1319.
- [12] Bellomo R, Ronco C, Kellum J, Mehta R, Palevsky P, the Aw. Acute renal failure - definition, outcome measures, animal models, fluid therapy and information technology needs: the Second International Consensus Conference of the Acute Dialysis Quality Initiative (ADQI) Group. *Critical Care* 2004;8(4):R204-R212.
- [13] Mehta RL, Kellum JA, Shah SV, Molitoris BA, Ronco C, Warnock DG, et al. Acute Kidney Injury Network: report of an initiative to improve outcomes in acute kidney injury. *Critical care* 2007;11(2):R31.

- 1  
2  
3 [14] Kidney Disease: Improving Global Outcomes (KDIGO) Acute Kidney Injury Work Group. KDIGO  
4 Clinical Practice Guideline for Acute Kidney Injury. *Kidney international* 2012;2:1-138.  
5
- 6 [15] Lafrance JP, Miller DR. Defining acute kidney injury in database studies: the effects of varying  
7 the baseline kidney function assessment period and considering CKD status. *American Journal of*  
8 *Kidney Diseases* 2010;56(4):651-660.  
9
- 10 [16] Stewart J, Findlay G, Smith N, Kelly K, Mason M. Adding Insult to Injury: A review of the care of  
11 patients who died in hospital with a primary diagnosis of acute kidney injury. London: National  
12 Confidential Inquiry into Patient Outcome and Death.; 2009.  
13
- 14 [17] Silver SA, Adu D, Agarwal S, Gupta KL, Lewington AJP, Pannu N, et al. Strategies to Enhance  
15 Rehabilitation After Acute Kidney Injury in the Developing World. *Kidney International Reports*  
16 2017;2(4):579-593.  
17
- 18 [18] Think Kidneys. Think Kidneys. 2015; Available at: <https://www.thinkkidneys.nhs.uk/>. Accessed  
19 07/04, 2017.  
20
- 21 [19] Mehta R, Bagga A, Patibandla R, Chakravarthi R. Detection and Management of AKI in the  
22 Developing World: The 18th Acute Disease Quality Initiative (ADQI) International Consensus  
23 Conference. *Kidney International Reports* 2017;2(4):515-518.  
24
- 25 [20] Mehta RL, Cerda J, Burdmann EA, Tonelli M, Garcia-Garcia G, Jha V, et al. International Society  
26 of Nephrology's Oby25 initiative for acute kidney injury (zero preventable deaths by 2025): a human  
27 rights case for nephrology. *Lancet* 2015;385(9987):2616-2643.  
28
- 29 [21] Sawhney S, Fluck N, Fraser SD, Marks A, Prescott GJ, Roderick PJ, et al. KDIGO-based acute  
30 kidney injury criteria operate differently in hospitals and the community—findings from a large  
31 population cohort. *Nephrology Dialysis Transplantation* 2016;31(6):922-929.  
32
- 33 [22] Uchino S, Bellomo R, Bagshaw SM, Goldsmith D. Transient azotaemia is associated with a high  
34 risk of death in hospitalized patients. *Nephrology Dialysis Transplantation* 2010;25(6):1833-1839.  
35
- 36 [23] Sawhney S, Mitchell M, Marks A, Fluck N, Black C. Long-term prognosis after acute kidney injury  
37 (AKI): what is the role of baseline kidney function and recovery? A systematic review. *BMJ Open*  
38 2015;5(1):e006497.  
39
- 40 [24] Playford CJ, Gayle V, Connelly R, Gray AJG. Administrative social science data: The challenge of  
41 reproducible research. *Big Data & Society* 2016;3(2):2053951716684143.  
42
- 43 [25] Bagshaw SM, Goldstein SL, Ronco C, Kellum JA. Acute kidney injury in the era of big data: the  
44 15th Consensus Conference of the Acute Dialysis Quality Initiative (ADQI). *Canadian Journal of*  
45 *Kidney Health and Disease* 2016;3(1):1-5.  
46
- 47 [26] NHS England. Patient safety alert on standardising the early identification of Acute Kidney  
48 Injury. 2014; Available at: <http://www.england.nhs.uk/2014/06/09/psa-aki/>. Accessed 07/04, 2017.  
49
- 50 [27] Sawhney S, Marks A, Fluck N, Levin A, Prescott GJ, Black C. Intermediate and Long-Term  
51 Outcomes of Survivors of Acute Kidney Injury Episodes: A Large Population-Based Cohort Study.  
52 *American Journal of Kidney Diseases* 2017;69(1):18-28.  
53  
54  
55  
56  
57  
58  
59  
60

- 1  
2  
3 [28] Sawhney S, Marks A, Fluck N, Levin A, McLernon D, Prescott G, et al. Post-discharge kidney  
4 function is associated with subsequent ten-year renal progression risk among survivors of acute  
5 kidney injury. *Kidney international* 2017;92(2):440-452.  
6  
7 [29] Kidney Disease: Improving Global Outcomes (KDIGO) CKD Work Group. KDIGO Clinical Practice  
8 Guideline for the Evaluation and Management of Chronic Kidney Disease. *Kidney international*  
9 2013;3:1-150.  
10  
11 [30] Yancy CW, Jessup M, Bozkurt B, Butler J, Casey DE, Drazner MH, et al. 2013 ACCF/AHA Guideline  
12 for the Management of Heart Failure. *Circulation* 2013;128(16):e240.  
13  
14 [31] Guideline Development Group, Bilo H, Coentrao L, Couchoud C, Covic A, De Sutter J, et al.  
15 Clinical Practice Guideline on management of patients with diabetes and chronic kidney disease  
16 stage 3b or higher (eGFR <45 mL/min). *Nephrology Dialysis Transplantation* 2015;30:ii1-ii142.  
17  
18 [32] Fraccaro P, van der Veer SN, Brown B, Prosperi M, O'Donoghue D, Collins GS, et al. An external  
19 validation of models to predict the onset of chronic kidney disease using population-based electronic  
20 health records from Salford, UK. *BMC Medicine* 2016;14(1):104.  
21  
22 [33] Ford DV, Jones KH, Verplancke J, Lyons RA, John G, Brown G, et al. The SAIL Databank: building a  
23 national architecture for e-health research and evaluation. *BMC Health Services Research*  
24 2009;9(1):157.  
25  
26 [34] Lyons RA, Jones KH, John G, Brooks CJ, Verplancke J, Ford DV, et al. The SAIL databank: linking  
27 multiple health and social care datasets. *BMC Medical Informatics and Decision Making* 2009;9(1):3.  
28  
29 [35] Levey AS, Stevens LA, Schmid CH, Zhang Y, Castro AF, Feldman HI, et al. A New Equation to  
30 Estimate Glomerular Filtration Rate. *Annals of Internal Medicine* 2009;150(9):604-612.  
31  
32 [36] Roalfe AK, Holder RL, Wilson S. Standardisation of rates using logistic regression: a comparison  
33 with the direct method. *BMC Health Services Research* 2008;8(1):275.  
34  
35 [37] Stack AG, Casserly LF, Cronin CJ, Chernenko T, Cullen W, Hannigan A, et al. Prevalence and  
36 variation of Chronic Kidney Disease in the Irish health system: initial findings from the National  
37 Kidney Disease Surveillance Programme. *BMC Nephrology* 2014;15(1):185.  
38  
39 [38] Aumann N, Baumeister SE, Rettig R, Lieb W, Werner A, Doring A, et al. Regional Variation of  
40 Chronic Kidney Disease in Germany: Results From Two Population-Based Surveys. *Kidney and Blood  
41 Pressure Research* 2015;40(3):231-243.  
42  
43 [39] Yap Y, Chuang K, Chiang C, Chuang H, Lu S. Geographic Variation of Chronic Kidney Disease  
44 Prevalence: Correlation with the Incidence of Renal Cell Carcinoma or Urothelial Carcinoma? *BioMed  
45 Research International* 2015;2015:427084.  
46  
47 [40] Brück K, Stel VS, Gambaro G, Hallan S, Völzke H, Ärnlöv J, et al. CKD Prevalence Varies across the  
48 European General Population. *Journal of the American Society of Nephrology* 2016;27(7):2135-2147.  
49  
50 [41] Kashani K, Shao M, Li G, Williams AW, Rule AD, Kremers WK, et al. No increase in the incidence  
51 of acute kidney injury in a population-based annual temporal trends epidemiology study. *Kidney  
52 international* 2017;(in press).  
53  
54  
55  
56  
57  
58  
59  
60

1  
2  
3  
4  
5  
6  
7  
8  
9  
10  
11  
12  
13  
14  
15  
16  
17  
18  
19  
20  
21  
22  
23  
24  
25  
26  
27  
28  
29  
30  
31  
32  
33  
34  
35  
36  
37  
38  
39  
40  
41  
42  
43  
44  
45  
46  
47  
48  
49  
50  
51  
52  
53  
54  
55  
56  
57  
58  
59  
60

For peer review only

## Tables and Figures

Table 1 – Contextual information on the populations in this study

|                                                                                    | Grampian 2003                                                        | Grampian 2007                                                        | Grampian 2012                                                        | Swansea 2007                                                                                        | Salford 2012                                                                                        |
|------------------------------------------------------------------------------------|----------------------------------------------------------------------|----------------------------------------------------------------------|----------------------------------------------------------------------|-----------------------------------------------------------------------------------------------------|-----------------------------------------------------------------------------------------------------|
| Index year for assessing incident AKI episodes                                     | 2003                                                                 | 2007                                                                 | 2012                                                                 | 2007                                                                                                | 2012                                                                                                |
| Mid-year regional population (all ages) during index year <sup>1</sup>             | 529,360                                                              | 548,290                                                              | 573,400                                                              | 499,400                                                                                             | 237,085                                                                                             |
| Mid-year regional adult population (age ≥ 15 years) during index year <sup>1</sup> | 438,332                                                              | 458,900                                                              | 482,444                                                              | 415,500                                                                                             | 193,882                                                                                             |
| Percentage of population in urban settlements of > 10,000 people <sup>2</sup>      | 49.3%                                                                | 51.8%                                                                | 52.1%                                                                | 81.7%                                                                                               | 99.9%                                                                                               |
| Regional crude all-cause mortality rate ages 15+ (index year/100,000) <sup>1</sup> | 1192                                                                 | 1154                                                                 | 1093                                                                 | 1334                                                                                                | 1135                                                                                                |
| Crude adult incidence of chronic RRT per million population (UKRR) <sup>3</sup>    | 98                                                                   | 102                                                                  | 93                                                                   | 167                                                                                                 | 85                                                                                                  |
| Prevalence of chronic kidney disease per 100 people (QOF) <sup>4</sup>             | n/a <sup>5</sup>                                                     | 2.6                                                                  | 3.3                                                                  | 1.8                                                                                                 | 3.0                                                                                                 |
| Prevalence of coronary heart disease per 100 people (QOF) <sup>4</sup>             | 4.1                                                                  | 4.0                                                                  | 3.9                                                                  | 4.1                                                                                                 | 3.9                                                                                                 |
| Prevalence of diabetes registration per 100 people (QOF) <sup>4</sup>              | 3.0                                                                  | 3.3                                                                  | 4.2                                                                  | 4.3                                                                                                 | 4.5                                                                                                 |
| Prevalence of heart failure registration per 100 people (QOF) <sup>4</sup>         | n/a <sup>4</sup>                                                     | 0.8                                                                  | 0.8                                                                  | 1.0                                                                                                 | 0.9                                                                                                 |
| Prevalence of hypertension registration per 100 people (QOF) <sup>4</sup>          | 11.0                                                                 | 11.7                                                                 | 13.2                                                                 | 12.5                                                                                                | 13.8                                                                                                |
| Prevalence of stroke & TIA registration per 100 people (QOF) <sup>4</sup>          | 1.6                                                                  | 1.7                                                                  | 1.9                                                                  | 2.1                                                                                                 | 1.8                                                                                                 |
| Number of biochemistry departments for whole region                                | One department covers in and outpatient, community and private tests | One department covers in and outpatient, community and private tests | One department covers in and outpatient, community and private tests | Four departments cover in and outpatients, community and private tests                              | One department covers in and outpatient and community tests. Privately obtained samples unavailable |
| Means of excluding samples belonging to people on long term RRT from dataset       | Link to Scottish Renal Registry                                      | Link to Scottish Renal Registry                                      | Link to Scottish Renal Registry                                      | Removing samples from locations where renal replacement is performed, including intensive care unit | Read code screening                                                                                 |
| IDMS aligned creatinine assay                                                      | Yes                                                                  | Yes                                                                  | Yes                                                                  | From 2007                                                                                           | Yes                                                                                                 |

<sup>1</sup>From the Office of National Statistics<sup>2</sup>From the 2011 National Census in England and Wales and Scottish Government Urban Rural Classification<sup>3</sup>From the UK Renal Registry (UKRR) annual reports<sup>4</sup>Quality Outcomes Framework (QOF) data is incentivised information entered by GP practices. Not recorded in Grampian in 2003, for which 2004 data is provided where available.<sup>5</sup>Data not available

Table 2 – Baseline characteristics for each dataset

|                                                                                                           | Grampian 2003 |                     | Grampian 2007 |        | Grampian 2012 |        | Swansea 2007  |        | Salford 2012  |        |
|-----------------------------------------------------------------------------------------------------------|---------------|---------------------|---------------|--------|---------------|--------|---------------|--------|---------------|--------|
|                                                                                                           | Patient total | (%) <sup>1</sup>    | Patient total | (%)    | Patient total | (%)    | Patient total | (%)    | Patient total | (%)    |
| Adult resident population (aged ≥ 15)                                                                     | 438332        |                     | 458900        |        | 482444        |        | 415500        |        | 193882        |        |
| <b>Population ascertainment of renal impairment (eGFR &lt; 60 ml/min/1.73m<sup>2</sup>) in index year</b> |               |                     |               |        |               |        |               |        |               |        |
| No tests during index year                                                                                | 311922        | (71.2)              | 303673        | (66.2) | 301992        | (62.6) | 253531        | (61.0) | 116977        | (60.3) |
| eGFR ≥60 <sup>2</sup>                                                                                     | 101595        | (23.2)              | 120854        | (26.3) | 158736        | (32.9) | 129959        | (31.3) | 66890         | (34.5) |
| eGFR <60 <sup>2</sup>                                                                                     | 24805         | (5.7)               | 34373         | (11.3) | 21716         | (4.5)  | 32010         | (7.7)  | 10015         | (5.2)  |
| <b>Sufficiency of tests to enable AKI detection</b>                                                       |               |                     |               |        |               |        |               |        |               |        |
| People with no tests during index year                                                                    | 311922        | (71.2)              | 303673        | (66.2) | 301992        | (62.6) | 253531        | (61.0) | 116977        | (60.3) |
| People with insufficient tests                                                                            | 52602         | (12.0)              | 57788         | (12.6) | 69239         | (14.4) | 59839         | (14.4) | 31467         | (16.2) |
| People with ≥2 tests within 365 days                                                                      | 73808         | (16.8)              | 97439         | (21.2) | 111213        | (23.1) | 102130        | (24.6) | 45438         | (23.4) |
| <b>Characteristics of people with ≥ 2 tests within 365 days</b>                                           |               |                     |               |        |               |        |               |        |               |        |
| Proportion female                                                                                         | 40413         | (54.8)              | 53061         | (54.5) | 60330         | (54.2) | 55685         | (54.5) | 24723         | (54.4) |
| Median age (IQR)                                                                                          | 63 (48-74)    |                     | 63 (50-75)    |        | 63 (49-74)    |        | 64 (51-75)    |        | 63 (49-74)    |        |
| eGFR <60 <sup>2</sup>                                                                                     | 18573         | (25.2) <sup>3</sup> | 28274         | (29.0) | 18679         | (20.2) | 25952         | (25.4) | 8541          | (18.8) |

<sup>1</sup> Expressed as a percentage of total residents unless specified otherwise

<sup>2</sup> First estimated glomerular filtration rate in index year (ml/min/1.73m<sup>2</sup>)

<sup>3</sup> Expressed as a percentage of people with ≥ 2 tests within 365 days



Table 3 – Crude and standardised rates of AKI episodes, and components of AKI criteria

|                                                                                                                                                          | Grampian 2003                  | Grampian 2007       | Grampian 2012       | Swansea 2007        | Salford 2012        |
|----------------------------------------------------------------------------------------------------------------------------------------------------------|--------------------------------|---------------------|---------------------|---------------------|---------------------|
|                                                                                                                                                          | (Rate per 10,000) <sup>1</sup> | (Rate per 10,000)   | (Rate per 10,000)   | (Rate per 10,000)   | (Rate per 10,000)   |
| Adult resident population                                                                                                                                | 438332                         | 458900              | 482444              | 415500              | 193882              |
| <b>AKI incidence rates</b>                                                                                                                               |                                |                     |                     |                     |                     |
| Crude AKI incidence (95% CI)                                                                                                                             | 131.2 (127.7-134.7)            | 138.3 (134.9-141.7) | 139.1 (135.8-142.4) | 151.1 (147.4-154.8) | 124.3 (118.8-129.8) |
| Age-sex standardised AKI incidence (95% CI)                                                                                                              | 147.2 (143.3-151.1)            | 150.6 (146.9-154.3) | 146.3 (142.8-149.8) | 145.6 (142.0-149.2) | 141.8 (136.2-147.4) |
| Total AKI episodes                                                                                                                                       | 5749 (131)                     | 6346 (138)          | 6711 (139)          | 6266 (151)          | 2399 (124)          |
| People with AKI                                                                                                                                          | 5362 (122)                     | 5930 (129)          | 6277 (130)          | 5847 (141)          | 2208 (114)          |
| <b>Subgroups of people with AKI</b>                                                                                                                      |                                |                     |                     |                     |                     |
| AKI using hospital tests only                                                                                                                            | 4386 (100)                     | 4739 (103)          | 4492 (93)           | 4432 (107)          | n/a <sup>2</sup>    |
| Rigid KDIGO criteria                                                                                                                                     | 3436 (78)                      | 3803 (83)           | 3617 (75)           | 3469 (83)           | 1114 (57)           |
| People meeting 2d criterion                                                                                                                              | 2486 (57)                      | 2831 (62)           | 2714 (56)           | 2424 (58)           | 741 (38)            |
| People meeting 7d criterion                                                                                                                              | 2488 (57)                      | 2698 (56)           | 2664 (55)           | 2611 (63)           | 821 (42)            |
| People meeting 8-90d criterion                                                                                                                           | 2619 (60)                      | 2830 (59)           | 3351 (69)           | 3287 (79)           | 1163 (60)           |
| People meeting 91-365d criterion                                                                                                                         | 1408 (32)                      | 1528 (32)           | 1850 (38)           | 1591 (38)           | 737 (38)            |
| <b>People with AKI in age strata</b>                                                                                                                     |                                |                     |                     |                     |                     |
| ≥70 years                                                                                                                                                | 3205 (562)                     | 3561 (587)          | 3705 (572)          | 3785 (584)          | 1299 (544)          |
| 40-69 years                                                                                                                                              | 1765 (88)                      | 1903 (89)           | 2021 (89)           | 1699 (89)           | 740 (92)            |
| <40 years                                                                                                                                                | 392 (22)                       | 466 (25)            | 551 (29)            | 363 (23)            | 169 (19)            |
| <b>People with AKI in eGFR strata among people with at least two tests within 365 days (rates expressed within strata of tested individuals at risk)</b> |                                |                     |                     |                     |                     |
| Baseline eGFR ≥60                                                                                                                                        | 3612 (654)                     | 3874 (560)          | 4419 (478)          | 3648 (479)          | 1512 (410)          |
| Baseline eGFR 45-59                                                                                                                                      | 809 (673)                      | 940 (496)           | 894 (756)           | 1044 (618)          | 323 (607)           |
| Baseline eGFR 30-44                                                                                                                                      | 597 (1222)                     | 723 (1000)          | 661 (1282)          | 732 (1097)          | 202 (867)           |
| Baseline eGFR <30                                                                                                                                        | 344 (2064)                     | 393 (1861)          | 303 (1781)          | 423 (1778)          | 171 (1921)          |

<sup>1</sup>Rate expressed per 10,000 residents unless specified otherwise<sup>2</sup>Location data not available

Table 4 – Phenotype of AKI episodes

|                                                                   | <b>Grampian 2003</b> | <b>Grampian 2007</b> | <b>Grampian 2012</b> | <b>Swansea 2007</b> | <b>Salford 2012</b> |
|-------------------------------------------------------------------|----------------------|----------------------|----------------------|---------------------|---------------------|
|                                                                   | Total (%)<br>people  | Total (%)<br>people  | Total (%)<br>people  | Total (%)<br>people | Total (%)<br>people |
| <b>People with AKI</b>                                            | 5362                 | 5930                 | 6277                 | 5847                | 2208                |
| Proportion female                                                 | 2899 (54.1)          | 3256 (54.9)          | 3443 (54.9)          | 3195 (54.6)         | 1250 (56.6)         |
| Median age (IQR)                                                  | 73 (61-81)           | 74 (61-82)           | 74 (60-82)           | 76 (64-84)          | 74 (61-83)          |
| <b>Peak AKI severity stage for first episode</b>                  |                      |                      |                      |                     |                     |
| stage 1                                                           | 3720 (69.4)          | 4211 (71.0)          | 4389 (69.9)          | 3720 (63.6)         | 1435 (65.0)         |
| stage 2                                                           | 1014 (18.9)          | 1063 (17.9)          | 1174 (18.7)          | 1224 (20.9)         | 451 (20.4)          |
| stage 3                                                           | 628 (11.7)           | 656 (11.1)           | 714 (11.4)           | 903 (15.4)          | 322 (14.6)          |
| AKI stage progression                                             | 817 (15.2)           | 792 (13.4)           | 850 (13.5)           | 900 (15.4)          | 300 (13.6)          |
| <b>Baseline eGFR for first episode (ml/min/1.73m<sup>2</sup>)</b> |                      |                      |                      |                     |                     |
| ≥60                                                               | 3612 (67.4)          | 3874 (65.3)          | 4419 (70.4)          | 3648 (62.4)         | 1512 (68.5)         |
| 45-59                                                             | 809 (15.1)           | 940 (15.9)           | 894 (14.2)           | 1044 (17.9)         | 323 (14.6)          |
| 30-44                                                             | 597 (11.1)           | 723 (12.2)           | 661 (10.5)           | 732 (12.5)          | 202 (9.1)           |
| <30                                                               | 344 (6.4)            | 393 (6.6)            | 303 (4.8)            | 423 (7.2)           | 171 (7.7)           |
| <b>Prior AKI episodes detected in last 3 years</b>                |                      |                      |                      |                     |                     |
| No prior episodes                                                 | 4415 (82.3)          | 4847 (81.7)          | 5052 (80.5)          | 4824 (82.5)         | 1708 (77.4)         |
| 1 prior episode                                                   | 723 (13.5)           | 833 (14.0)           | 897 (14.3)           | 784 (13.4)          | 349 (15.8)          |
| 2 or more prior episodes                                          | 224 (4.2)            | 250 (4.2)            | 328 (5.2)            | 239 (4.1)           | 151 (6.8)           |
| Prior AKI within 1 year                                           | 414 (7.7)            | 459 (7.7)            | 492 (7.8)            | 488 (8.3)           | 216 (9.8)           |
| <b>Renal recovery to within 20% of baseline</b>                   |                      |                      |                      |                     |                     |
| Renal recovery                                                    | 2239 (41.8)          | 2588 (43.6)          | 3077 (49.0)          | 2156 (36.9)         | 970 (43.9)          |
| Renal non-recovery                                                | 2203 (41.1)          | 2387 (40.3)          | 2245 (35.8)          | 2635 (45.1)         | 820 (37.1)          |
| Repeat samples not available                                      | 920 (17.2)           | 955 (16.1)           | 955 (15.2)           | 1056 (18.1)         | 418 (18.9)          |

<sup>1</sup>Expressed as a percentage of people with at least one AKI episode

<sup>2</sup>Insufficient biochemistry data available to report on the previous 3 years

1  
2  
3 Figure 1 – Conceptual framework for the reasons for cross-population differences in AKI rates

4  
5 Figure 2 – Crude and age-sex standardised rate of AKI episodes

6  
7 Figure 3 – Crude AKI rates using different interpretations of the KDIGO-based AKI definition

8  
9 Figure 4 – Patterns of blood testing by clinical location (4A), and by test regularity (4B)

10  
11  
12  
13  
14  
15  
16  
17  
18  
19  
20  
21  
22  
23  
24  
25  
26  
27  
28  
29  
30  
31  
32  
33  
34  
35  
36  
37  
38  
39  
40  
41  
42  
43  
44  
45  
46  
47  
48  
49  
50  
51  
52  
53  
54  
55  
56  
57  
58  
59  
60

For peer review only

1  
2  
3  
4  
5  
6  
7  
8  
9  
10  
11  
12  
13  
14  
15  
16  
17  
18  
19  
20  
21  
22  
23  
24  
25  
26  
27  
28  
29  
30  
31  
32  
33  
34  
35  
36  
37  
38  
39  
40  
41  
42  
43  
44  
45  
46  
47  
48  
49  
50  
51  
52  
53  
54  
55  
56  
57  
58  
59  
60

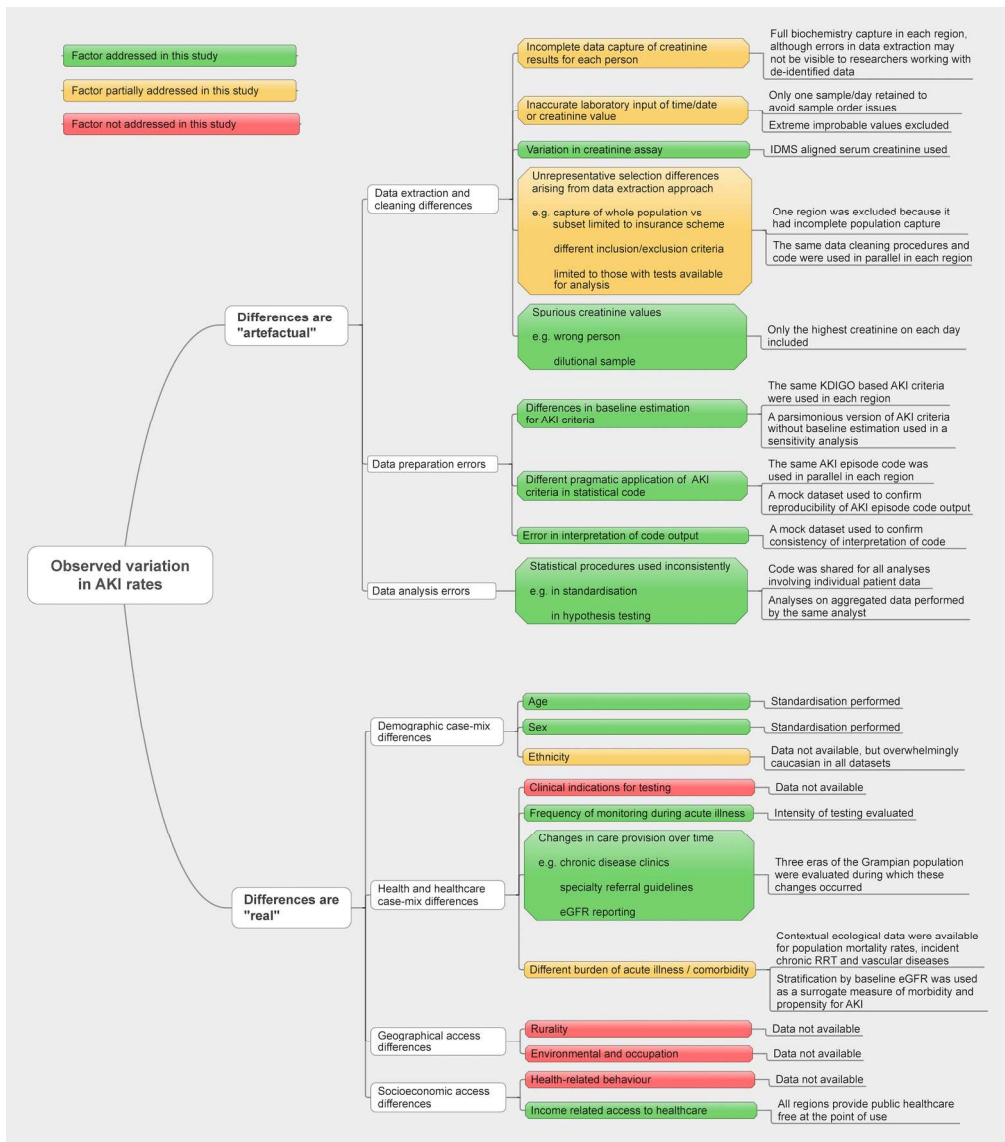

Conceptual framework for the reasons for cross-population differences in AKI rates

181x205mm (300 x 300 DPI)

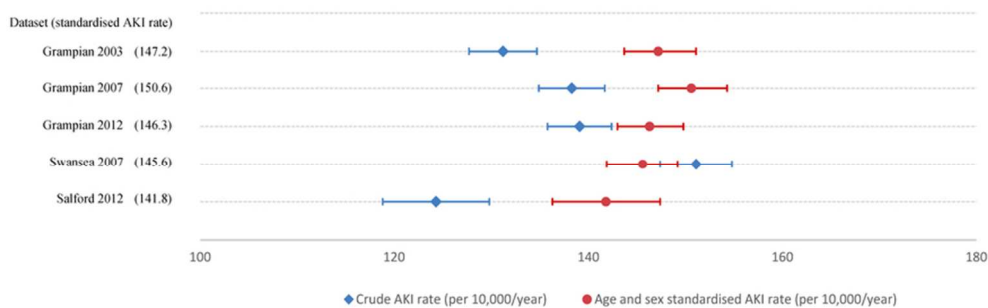

Crude and age-sex standardised rate of AKI episodes

75x25mm (300 x 300 DPI)

peer review only

1  
2  
3  
4  
5  
6  
7  
8  
9  
10  
11  
12  
13  
14  
15  
16  
17  
18  
19  
20  
21  
22  
23  
24  
25  
26  
27  
28  
29  
30  
31  
32  
33  
34  
35  
36  
37  
38  
39  
40  
41  
42  
43  
44  
45  
46  
47  
48  
49  
50  
51  
52  
53  
54  
55  
56  
57  
58  
59  
60

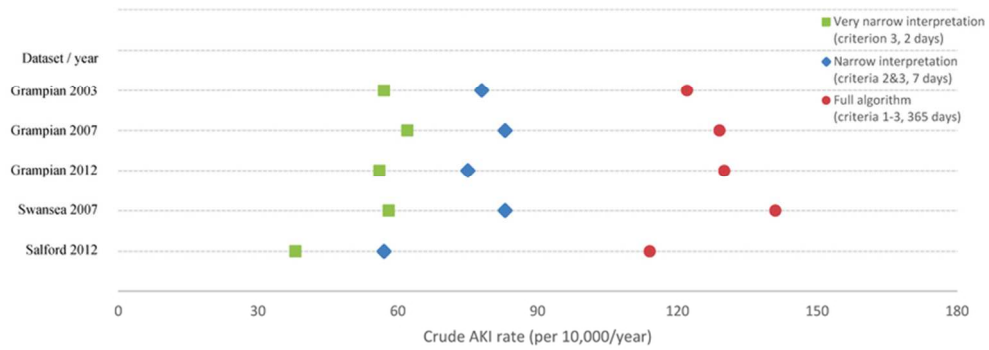

Crude AKI rates using different interpretations of the KDIGO-based AKI definition

73x26mm (300 x 300 DPI)

peer review only

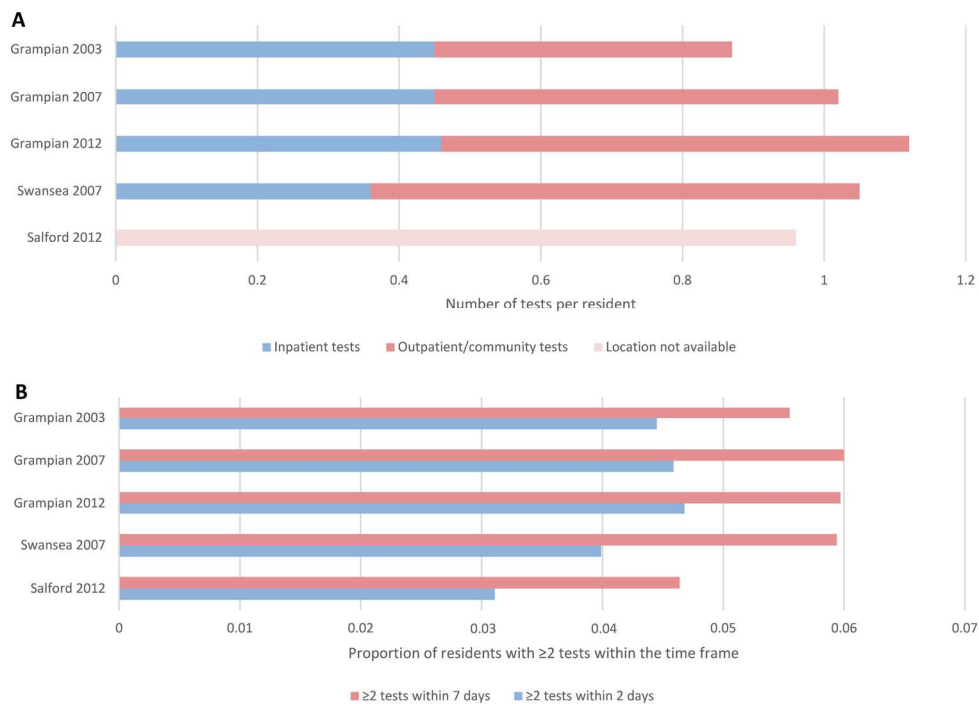

Patterns of blood testing by clinical location (4A), and by test regularity (4B)

155x111mm (300 x 300 DPI)

Supplemental table 1 – AKI definition and phenotype criteria for this study

| <b>AKI Criteria</b>        | <b>AKI definition</b>                                                                                                                             |
|----------------------------|---------------------------------------------------------------------------------------------------------------------------------------------------|
| Criterion 1                | Serum creatinine $\geq 1.5$ times higher than the median of all creatinine values 8-90 days ago, or 91-365 days ago if no tests between 8-90 days |
| Criterion 2                | Serum creatinine $\geq 1.5$ times higher than the lowest creatinine within 7 days                                                                 |
| Criterion 3                | Serum creatinine $>26$ $\mu\text{mol/L}$ higher than the lowest creatinine within 48 hours                                                        |
| <b>AKI severity</b>        | <b>Staging definition (based on peak creatinine within 90 days of diagnosis)</b>                                                                  |
| Stage 1                    | Rise in creatinine of $>26$ $\mu\text{mol/L}$ ; or index/baseline ratio $\geq 1.5$ and $<2$                                                       |
| Stage 2                    | Index/baseline ratio $\geq 2$ and $<3$                                                                                                            |
| Stage 3                    | Index/baseline ratio $\geq 3$ ; or $\geq 1.5$ and index creatinine $>354$ $\mu\text{mol/L}$                                                       |
| <b>Prior AKI episodes</b>  | <b>Prior AKI definition</b>                                                                                                                       |
| No prior AKI               | AKI episode not preceded by any previous AKI episodes in the prior 3 years                                                                        |
| Prior AKI                  | AKI episode preceded by at least one previous AKI episode in the prior 3 years                                                                    |
| Recent prior AKI           | AKI episode preceded by at least one previous AKI episode in the prior 1 year                                                                     |
| <b>90 day AKI recovery</b> | <b>Recovery definition</b>                                                                                                                        |
| Recovery                   | Last creatinine within 90 days of AKI $<1.2$ times higher than the baseline creatinine at diagnosis                                               |
| Non-recovery               | Last creatinine within 90 days of AKI $\geq 1.2$ times higher than the baseline creatinine at diagnosis, or still receiving acute RRT             |
| “Untested”                 | No repeat blood tests taken within 90 days of AKI diagnosis                                                                                       |

Abbreviations: AKI, acute kidney injury; RRT, renal replacement therapy



Supplementary figure 1 – Map of the UK populations in this analysis

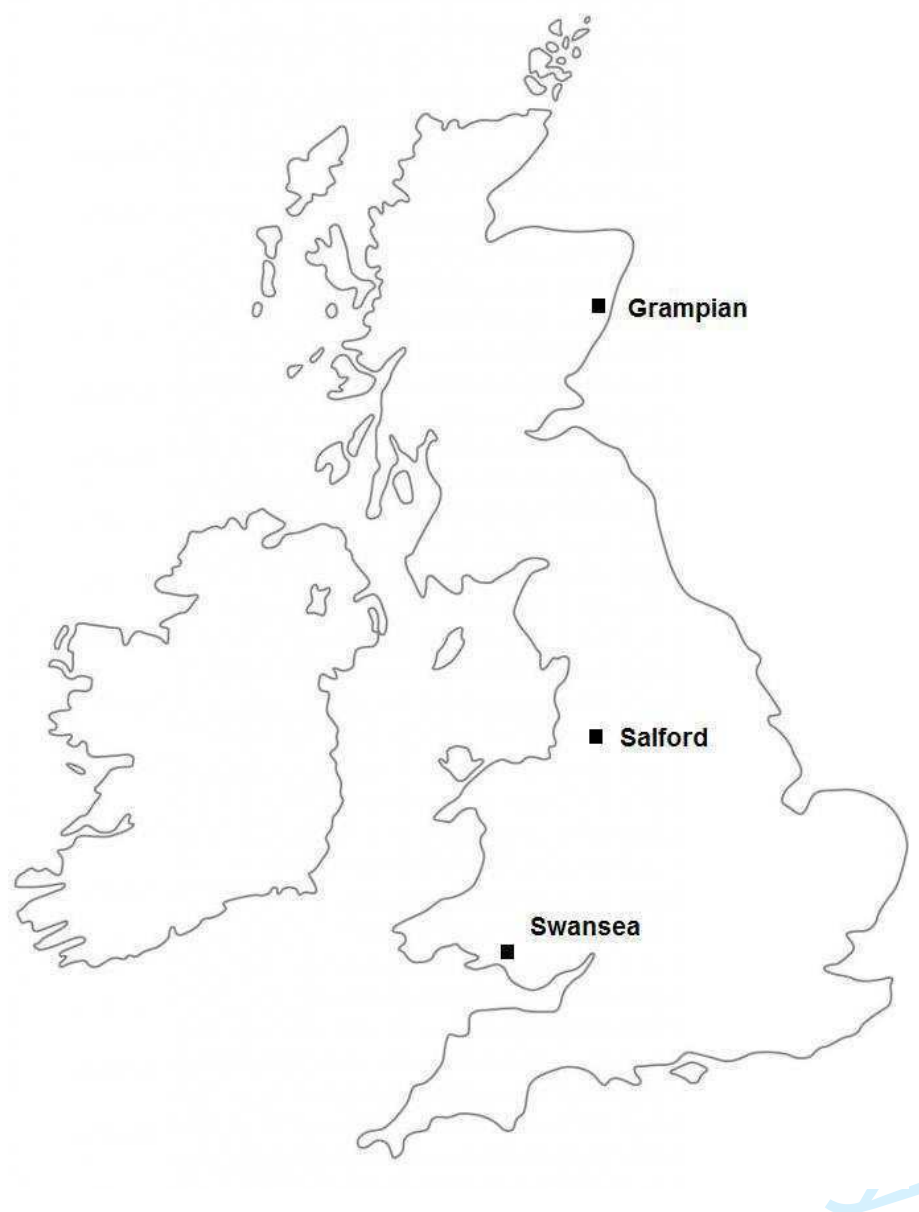

Supplemental figure 2 – Hypothetical patient illustrating look-back (for baseline) and look-forward (for AKI episode phenotyping) time periods from the start of an AKI episode

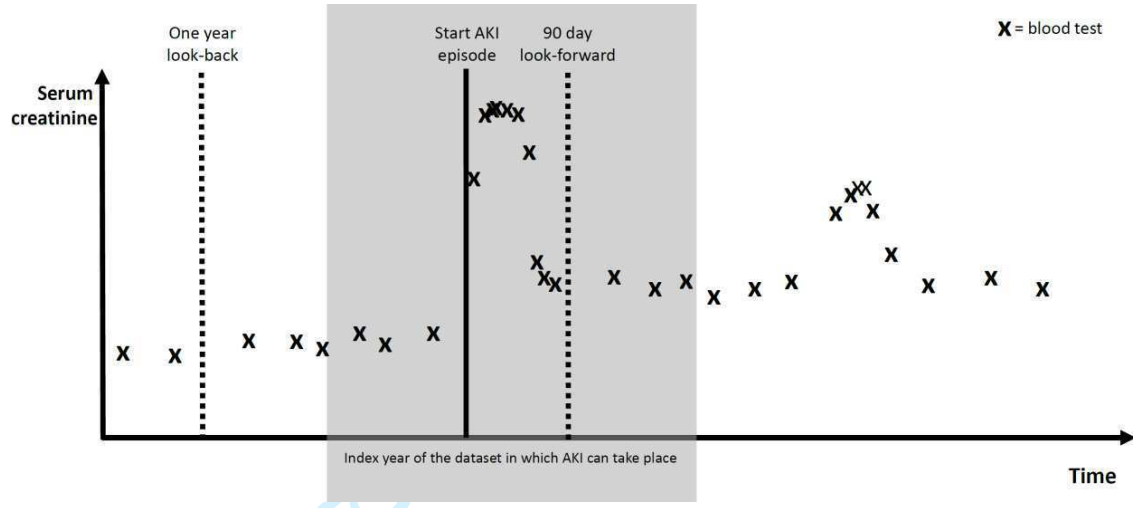

STROBE Statement—Checklist of items that should be included in reports of *cohort studies*

|                              | Item No | Recommendation                                                                                                                                                                                    | Pages                  |
|------------------------------|---------|---------------------------------------------------------------------------------------------------------------------------------------------------------------------------------------------------|------------------------|
| <b>Title and abstract</b>    | 1       | (a) Indicate the study's design with a commonly used term in the title or the abstract                                                                                                            | 3                      |
|                              |         | (b) Provide in the abstract an informative and balanced summary of what was done and what was found                                                                                               | 3                      |
| <b>Introduction</b>          |         |                                                                                                                                                                                                   |                        |
| Background/rationale         | 2       | Explain the scientific background and rationale for the investigation being reported                                                                                                              | 5                      |
| Objectives                   | 3       | State specific objectives, including any prespecified hypotheses                                                                                                                                  | 6                      |
| <b>Methods</b>               |         |                                                                                                                                                                                                   |                        |
| Study design                 | 4       | Present key elements of study design early in the paper                                                                                                                                           | 6                      |
| Setting                      | 5       | Describe the setting, locations, and relevant dates, including periods of recruitment, exposure, follow-up, and data collection                                                                   | 6                      |
| Participants                 | 6       | (a) Give the eligibility criteria, and the sources and methods of selection of participants. Describe methods of follow-up                                                                        | 7, 8                   |
|                              |         | (b) For matched studies, give matching criteria and number of exposed and unexposed                                                                                                               | n/a                    |
| Variables                    | 7       | Clearly define all outcomes, exposures, predictors, potential confounders, and effect modifiers. Give diagnostic criteria, if applicable                                                          | 9, 10                  |
| Data sources/<br>measurement | 8*      | For each variable of interest, give sources of data and details of methods of assessment (measurement). Describe comparability of assessment methods if there is more than one group              | 8-10                   |
| Bias                         | 9       | Describe any efforts to address potential sources of bias                                                                                                                                         | 9                      |
| Study size                   | 10      | Explain how the study size was arrived at                                                                                                                                                         | 6, 11,<br>table 1      |
| Quantitative variables       | 11      | Explain how quantitative variables were handled in the analyses. If applicable, describe which groupings were chosen and why                                                                      | 10, 11                 |
| Statistical methods          | 12      | (a) Describe all statistical methods, including those used to control for confounding                                                                                                             | 10,11                  |
|                              |         | (b) Describe any methods used to examine subgroups and interactions                                                                                                                               | 10,11                  |
|                              |         | (c) Explain how missing data were addressed                                                                                                                                                       | n/a                    |
|                              |         | (d) If applicable, explain how loss to follow-up was addressed                                                                                                                                    | n/a                    |
|                              |         | (e) Describe any sensitivity analyses                                                                                                                                                             | 11                     |
| <b>Results</b>               |         |                                                                                                                                                                                                   |                        |
| Participants                 | 13*     | (a) Report numbers of individuals at each stage of study—eg numbers potentially eligible, examined for eligibility, confirmed eligible, included in the study, completing follow-up, and analysed | 11,<br>tables 1<br>& 2 |
|                              |         | (b) Give reasons for non-participation at each stage                                                                                                                                              | 7                      |
|                              |         | (c) Consider use of a flow diagram                                                                                                                                                                | n/a                    |
| Descriptive data             | 14*     | (a) Give characteristics of study participants (eg demographic, clinical, social) and information on exposures and potential confounders                                                          | Tables 1<br>and 2      |
|                              |         | (b) Indicate number of participants with missing data for each variable of interest                                                                                                               | n/a                    |
|                              |         | (c) Summarise follow-up time (eg, average and total amount)                                                                                                                                       | n/a                    |
| Outcome data                 | 15*     | Report numbers of outcome events or summary measures over time                                                                                                                                    | 12, 13,<br>table 3     |

|    |                          |    |                                                                                                                                                                                                              |                 |
|----|--------------------------|----|--------------------------------------------------------------------------------------------------------------------------------------------------------------------------------------------------------------|-----------------|
| 1  | Main results             | 16 | (a) Give unadjusted estimates and, if applicable, confounder-adjusted estimates and their precision (eg, 95% confidence interval). Make clear which confounders were adjusted for and why they were included | 12, 13, table 3 |
| 2  |                          |    | (b) Report category boundaries when continuous variables were categorized                                                                                                                                    | Table 3         |
| 3  |                          |    | (c) If relevant, consider translating estimates of relative risk into absolute risk for a meaningful time period                                                                                             | n/a             |
| 4  |                          |    |                                                                                                                                                                                                              |                 |
| 5  | Other analyses           | 17 | Report other analyses done—eg analyses of subgroups and interactions, and sensitivity analyses                                                                                                               | Tables 3 & 4    |
| 6  |                          |    |                                                                                                                                                                                                              |                 |
| 7  |                          |    |                                                                                                                                                                                                              |                 |
| 8  |                          |    |                                                                                                                                                                                                              |                 |
| 9  |                          |    |                                                                                                                                                                                                              |                 |
| 10 |                          |    |                                                                                                                                                                                                              |                 |
| 11 | <b>Discussion</b>        |    |                                                                                                                                                                                                              |                 |
| 12 | Key results              | 18 | Summarise key results with reference to study objectives                                                                                                                                                     | 13, 14          |
| 13 | Limitations              | 19 | Discuss limitations of the study, taking into account sources of potential bias or imprecision. Discuss both direction and magnitude of any potential bias                                                   | 15              |
| 14 |                          |    |                                                                                                                                                                                                              |                 |
| 15 |                          |    |                                                                                                                                                                                                              |                 |
| 16 | Interpretation           | 20 | Give a cautious overall interpretation of results considering objectives, limitations, multiplicity of analyses, results from similar studies, and other relevant evidence                                   | 16              |
| 17 |                          |    |                                                                                                                                                                                                              |                 |
| 18 |                          |    |                                                                                                                                                                                                              |                 |
| 19 |                          |    |                                                                                                                                                                                                              |                 |
| 20 | Generalisability         | 21 | Discuss the generalisability (external validity) of the study results                                                                                                                                        | 15              |
| 21 |                          |    |                                                                                                                                                                                                              |                 |
| 22 | <b>Other information</b> |    |                                                                                                                                                                                                              |                 |
| 23 | Funding                  | 22 | Give the source of funding and the role of the funders for the present study and, if applicable, for the original study on which the present article is based                                                | 17              |
| 24 |                          |    |                                                                                                                                                                                                              |                 |
| 25 |                          |    |                                                                                                                                                                                                              |                 |

\*Give information separately for exposed and unexposed groups.

**Note:** An Explanation and Elaboration article discusses each checklist item and gives methodological background and published examples of transparent reporting. The STROBE checklist is best used in conjunction with this article (freely available on the Web sites of PLoS Medicine at <http://www.plosmedicine.org/>, Annals of Internal Medicine at <http://www.annals.org/>, and Epidemiology at <http://www.epidem.com/>). Information on the STROBE Initiative is available at <http://www.strobe-statement.org>.
